1 **miRNome profiling of lung cancer metastases revealed a key role for miRNA-PD-L1 axis in the**  
2 **modulation of chemotherapy response.**

3  
4 Roberto Cuttano<sup>1</sup>, Tommaso Colangelo<sup>1†</sup>, Juliana Guarize<sup>2†</sup>, Elisa Dama<sup>1</sup>, Maria Pia Cocomazzi<sup>1</sup>,  
5 Francesco Mazzei<sup>1</sup>, Valentina Melocchi<sup>1</sup>, Orazio Palumbo<sup>3</sup>, Elena Marino<sup>4</sup>, Elena Belloni<sup>5</sup>, Francesca  
6 Montani<sup>5</sup>, Manuela Vecchi<sup>6,7‡</sup>, Massimo Barberis<sup>8</sup>, Paolo Graziano<sup>9</sup>, Andrea Pasquier<sup>10</sup>, Julian Sanz-  
7 Ortega<sup>11</sup>, Luis M. Montuenga<sup>10,12</sup>, Cristiano Carbonelli<sup>13</sup>, Lorenzo Spaggiari<sup>2,14</sup>, Fabrizio Bianchi<sup>1\*</sup>

8  
9 <sup>1</sup> Unit of Cancer Biomarkers, Fondazione IRCCS Casa Sollievo della Sofferenza; Viale Cappuccini snc,  
10 71013 San Giovanni Rotondo, Italy.

11 <sup>2</sup> Division of Thoracic Surgery, IEO, European Institute of Oncology IRCCS; 20141 Milan, Italy.

12 <sup>3</sup> Division of Medical Genetics, Fondazione IRCCS Casa Sollievo della Sofferenza; Viale Cappuccini  
13 snc, 71013 San Giovanni Rotondo, Italy.

14 <sup>4</sup> Clinical Genomics Unit, European Institute of Oncology; Milan, Italy.

15 <sup>5</sup> Department of Experimental Oncology, European Institute of Oncology; Milan, Italy.

16 <sup>6</sup> European Institute of Oncology IRCCS, Milan, Italy.

17 <sup>7</sup> IFOM, Fondazione Istituto FIRC di Oncologia Molecolare, Via Adamello 16, 20139, Milan, Italy.

18 <sup>8</sup> Division of Pathology, European Institute of Oncology IRCCS; 20141 Milan, Italy.

19 <sup>9</sup> Unit of Pathology, Fondazione IRCCS Casa Sollievo della Sofferenza; Viale Cappuccini snc, 71013  
20 San Giovanni Rotondo, Italy.

21 <sup>10</sup> Solid Tumors Program, Center of Applied Medical Research (CIMA). University of Navarra and  
22 IDISNA, Pamplona, Spain.

23 <sup>11</sup> Department of Pathology, Clínica Universidad de Navarra; Madrid, Spain.

24 <sup>12</sup> CIBERONC, Madrid, Spain.

25 <sup>13</sup> Pneumology Unit, Department of Medical Sciences, Fondazione IRCCS Casa Sollievo della  
26 Sofferenza; 71013 San Giovanni Rotondo (FG); Italy.

27 <sup>14</sup> Department of Oncology and Hemato-Oncology, University of Milan; Milan, Italy.

28 † These authors contributed equally to this work.

29 ‡ present address: Non-coding RNAs and RNA-based Therapeutics, Istituto Italiano di Tecnologia,  
30 CMP<sup>3</sup>VdA, Via Laboratori Vittime del Col du Mont 28, 11100 Aosta, Italy.

31

32 \*Corresponding Author: Fabrizio Bianchi, Unit of Cancer Biomarkers, Institute for Stem Cell Biology,  
33 Regenerative Medicine and Innovative Therapies (ISBReMIT), Fondazione IRCCS Casa Sollievo della  
34 Sofferenza, Viale Padre Pio 7, 71013 San Giovanni Rotondo, Italy; [f.bianchi@operapadrepio.it](mailto:f.bianchi@operapadrepio.it).

35

36 **Keywords:** lung cancer, NSCLC, microRNA, gene expression, chemotherapy, PD-L1, miR-455-5p

37

38

39

40

41

42

43

44

45

46

47

48

49 **ABSTRACT**

50 Locally-advanced non–small-cell lung cancer (NSCLC) is frequent at diagnosis and requires multimodal  
51 treatment approaches. Neoadjuvant chemotherapy (NACT) followed by surgery is the treatment of  
52 choice for operable locally-advanced NSCLC (Stage IIIA). However, the majority of patients are NACT-  
53 resistant and shows persistent lymph nodal metastases (LNmets) and an adverse outcome. Therefore, the  
54 identification of mechanisms and biomarkers of NACT resistance is paramount for ameliorating  
55 prognosis of patients with Stage IIIA NSCLC. Here, we investigated the miRNome and transcriptome of  
56 chemo naïve LNmets collected from patients with Stage IIIA NSCLC (N=64). We found that a  
57 microRNA signature accurately predicts NACT response. Mechanistically, we discovered a miR-455-  
58 5p/PD-L1 regulatory axis which drives chemotherapy resistance, hallmarks metastases with active IFN-  
59  $\gamma$  response pathway (an inducer of PD-L1 expression), and impacts T cells viability and relative  
60 abundances in tumor-microenvironment (TME). Our data provides new biomarkers to predict NACT  
61 response and adds molecular insights relevant for improving the management of patients with locally-  
62 advanced NSCLC.

63

64

65

66

67

68

69

70

71

72 **Main Text:**

73 **BACKGROUND**

74 Lung cancer is frequently diagnosed as advanced stage disease (Stage III-IV) with metastases spread to  
75 regional and distant organs in more than two-third of cases [1]. Despite the progress made in early  
76 diagnosis and treatment, the prognosis of patients remains poor with 5-year survival rates ranging from  
77 32% to 6%, depending on the presence of regional or distant metastases, respectively [1]. One-third of  
78 patients with non-small cell lung cancer (NSCLC), i.e. the most common type of lung cancer (~80-85%  
79 of cases), are diagnosed with locally advanced disease (Stage III). Stage III disease is heterogenous both  
80 for tumor size (from <3cm, T1; to >7cm, T4) and metastatic spreading (i.e., regional lymph nodes, N2-  
81 N3; ipsilateral peribronchial and/or ipsilateral hilar lymph nodes and intrapulmonary nodes, N1) [2].  
82 Stage IIIA-N2 disease is prevalent and, when resectable, is preferentially treated by neoadjuvant  
83 chemotherapy (NACT; platinum-based doublet (P-doublet)) before surgery to target nodal metastases  
84 and reduce/eradicate metastatic disease. Indeed, NACT is an effective treatment in N2 patients improving  
85 the overall survival by 5% at 5-years [3]. However, clinical responses to NACT differ widely, ranging  
86 from patients achieving a complete eradication of all nodal metastases at the time of surgery (pN0) to  
87 patients having persistent metastatic disease (pN+) [4–6], which suggests the presence of different  
88 molecular features among and within nodal metastatic lesions, as recently described also in other studies  
89 [7,8]. Recently, the combination of immune checkpoint inhibitors (ICI) targeting the PD-1/PD-L1 axis  
90 (i.e., Nivolumab) with P-doublet chemotherapy in the neoadjuvant setting, showed an improved clinical  
91 management of patients with resectable NSCLC [9] and gained approval by Food and Drug  
92 Administration (FDA). In addition, other ongoing clinical trials are also evaluating the efficacy of ICI  
93 alone or in combination with NACT for stage IIIA-N2 NSCLC patients [10]. Nevertheless, the current  
94 scant knowledge of the molecular biology of metastases makes it difficult to search for cancer driver  
95 mechanisms alongside the development of predictive biomarkers and new druggable targets.

96 Here, by exploring the miRNA-mRNA transcriptional network of lung cancer lymph node metastases in  
97 stage IIIA-N2 disease, we derived miRNA signatures predictive of NACT response. Importantly, using  
98 *in vitro* and *in vivo* lung cancer models, we showed for the first time the role of miR-455-5p in mediating  
99 chemotherapy resistance and immune evasion by means of PD-L1 expression regulation.

100

## 101 **RESULTS**

### 102 **Lung metastatic cells exhibit a distinct miRNA profile according to their sensitivity to NACT**

103 We initially investigated the molecular profile of tumor metastatic cells from mediastinal lymph nodes  
104 (i.e., LNmets; station 4 and 7; see method) collected by endobronchial ultrasound transbronchial needle  
105 aspiration (EBUS-TBNA) before NACT in treatment naïve stage IIIA patients who had a complete  
106 pathological response (pN0; n=5) or with persistent disease (pN2; n=7) after P-doublet NACT (i.e.,  
107 EBUS-samples; Table 1). LNmets were expanded in cell culture (Fig. 1A) as we previously showed [11];  
108 morphological examination together with immunofluorescence staining using anti-pan-cytokeratin  
109 antibody (Pan-CK) confirmed their epithelial origin (Fig. 1B). Yet, LNmets were enriched in the  
110 expression of typical markers of cells constituting the airway epithelium (*NKX2-1*, *KRT5*, *CC10*, *SOX2*,  
111 *SFTPC*; Fig. 1C). Next, we performed high-throughput microRNA expression profiling of LNmets by  
112 TaqMan Low-density Array (TLDA; see Methods) and we detected a total of 197 miRNAs (Cqn <30.01  
113 in at least 50% of samples for group; see Methods) (Fig. 1D-E; Data File 1). Overall, many miRNAs  
114 were downregulated in patients who developed pN2 disease (n=87, 44.9%; FC <0.67) (Fig. 1F), with 16  
115 miRNAs (aka, LN-signature) statistically significant (p<0.05) (Fig. 1F-G). TLDA analysis of LNmets in  
116 a second independent FFPE cohort of stage III patients (n=52) collected by mediastinoscopy (i.e., MED-  
117 samples; Table 2; Fig. S1A; see Methods) resulted in the detection of 170 miRNAs (Fig. S1B), largely  
118 overlapping with those identified in EBUS-samples (Fig. S1C) and with a comparable expression level  
119 (Fig. S1D). Again, we observed a general loss of miRNA expression in patients who developed pN2

120 disease (Fig. S1E-F). Unsupervised clustering analysis using the LN-signature discriminated pN0 from  
121 pN2 also in this independent cohort of patients (Fig. 2A), while partial responder patients (pN1), in line  
122 with their intermediate phenotype, resulted to be scattered along the cluster (Fig. 2A). Notably, MED-  
123 samples showed a similar epithelial cell content as in EBUS-samples though with a stronger expression  
124 of markers of tumor microenvironment (TME) (*CDH5*, *PTPRC aka CD45*, and *ACTA2*) (Fig. 2B) which,  
125 on the contrary, were absent in pure epithelial LNmets (EBUS-samples). Yet, 12 out of the 16 miRNAs  
126 of the original LN-signature were also found differentially expressed in MED-samples (pN2 vs. pN0;  
127  $p < 0.05$ ) (Fig. 2C and Fig. S1G). Ridge-penalized logistic regression using the LN-signature (16-miRNA  
128 model) resulted in a perfect separation of responders and non-responders in the EBUS-cohort when used  
129 as training set, which slightly decreased in the MED-cohort used as validation set (AUC=0.76) (Fig. 2D-  
130 E, Table S1). When only miRNAs detected in MED-samples were used (14-miRNA model), the model  
131 reached an AUC=0.82 in the validation set (Fig. 2D and F, Table S1). Lastly, as small numbers of  
132 biomarkers are easier to use in the clinical practice, we applied LASSO regression which identified a  
133 signature of 4 miRNAs (4-miRNA model) with an AUC of 0.81 in the validation set (Fig. 2D and G,  
134 Table S1). Importantly, the clinical model alone, built by combining all available clinical and  
135 pathological parameters, showed an AUC of 67% in the validation set which increased up to 82% when  
136 combined to miRNA-based risk models (Table 3). Collectively, these results showed a distinct pattern  
137 of miRNA expression in LNmets which is predictive of chemotherapy response.

138

### 139 **Functional analysis of predictive microRNAs to NACT response**

140 We then used the LN-signature to identify mechanisms of chemotherapy resistance. First, we analyzed  
141 public drug screening datasets, such as CTRPv2, GDSC1-2 and PRISM [12–16], to retrieve cisplatin  
142 (i.e., the backbone component of NACT) sensitivity data in NSCLC cell lines for which miRNA  
143 expression data were available (CCLE dataset). Unexpectedly, cytotoxic effect of cisplatin was

144 negligible in the majority of the cell lines at the indicated doses (Fig. 3A, Table S2). However, we noticed  
145 that, at least in the GDSC2 dataset, DMSO was used as compound vehicle, which is known to rapidly  
146 inactivate cisplatin [17]. Therefore, we performed a small-scale drug screening to test cisplatin sensitivity  
147 (dissolved in NaCl 0.9%) of a panel of metastatic NSCLC cell lines. Cells were treated with increasing  
148 doses of cisplatin and drug sensitivity was measured by sigmoidal curve fitting (Fig. 3B). NSCLC cell  
149 lines exhibited a heterogenous sensitivity profile to cisplatin, with potency ( $IC_{50}$ ) ranging from 1.5 to  
150  $11\mu\text{M}$  and efficacy ( $E_{\text{max}}$ ) calculated at the peak plasma concentration of cisplatin upon injection ( $C_{\text{max}}$ ,  
151  $\sim 12\mu\text{M}$ : [18,19]) from 0 to 0.5 relative cell viability (Fig. 3C). When we analyzed the expression of our  
152 LN-signature in chemo-naïve NSCLC cell lines, we observed a variable degree of association between  
153  $IC_{50}/E_{\text{max}}$  values and miRNAs expression (Fig. 3D). Interestingly, miR-455-5p was the top scoring in  
154 terms of negative correlation to cisplatin  $IC_{50}/E_{\text{max}}$  values ( $IC_{50}$ ,  $r=-0.82$   $p=0.034$ ;  $E_{\text{max}}$ ,  $r=-0.71$   $p=0.088$ )  
155 (Fig. 3D-E). As shown above, this was in line with the downregulation of miR-455-5p observed in  
156 LNmets of NACT-resistant patients (Fig. 3F). We also scored a negative correlation for miR-140-3p  
157 ( $IC_{50}$ ,  $r=-0.76$   $p=0.037$ ;  $E_{\text{max}}$ ,  $r=-0.69$   $p=0.069$ ) whose overexpression was indeed shown to sensitize  
158 NSCLC cells to cisplatin [20,21] (Fig. 3D).

159

### 160 **miR-455-5p regulates cisplatin resistance of lung metastatic cells**

161 Next, we investigated whether miR-455-5p was sufficient to modulate chemotherapy response of  
162 NSCLC cells. To this end, we took advantage of the NCI-H1993 cell line which *i*) was derived from  
163 LNmets of a stage IIIA NSCLC patient, *ii*) is a miR-455-5p low expressing cell line and *iii*) has a higher  
164 resistance to cisplatin (Fig. 3E). NCI-H1993 cells were transfected with a miR-455-5p mimic (OE) or a  
165 negative mimic control (CTRL) and the increased levels of miR-455-5p after overexpression were  
166 confirmed by qRT-PCR (Fig. 4A). Importantly, we observed that miR-455-5p OE in NCI-H1993  
167 strongly increased sensitivity to cisplatin (Fig. 4B) with a significant decrease of cisplatin potency in

168 comparison to CTRL cells (Fig. 4C). We then investigated whether miR-455-5p could play a role also in  
169 acquiring cisplatin resistance and thus we treated the cisplatin sensitive NCI-H2023 cell line (Fig. 3C)  
170 with increasing doses of cisplatin during cycles of drug on (4 days) and drug off (1–2 weeks) (Fig. 4D).  
171 Long-term treatment with cisplatin resulted in the generation of a resistant variant of the NCI-H2023 cell  
172 line namely the NCI-H2023-CDDP-R (aka, CDDP-R), which was characterized by a significant increase  
173 in both  $IC_{50}$  and  $E_{max}$  in comparison to parental cells (Fig. S2A-B). The acquirement of resistance to  
174 cisplatin was accompanied by the acquisition of a typical elongated cell shape (Fig. S2C), an increased  
175 mRNA and protein expression of epithelial-to-mesenchymal transition (EMT) master regulators (i.e.,  
176 ZEB1, SLUG and TWIST1) and of mesenchymal/stem cells markers (VIM, ACTA-2, CD90) (Fig. S2D-  
177 F) [22]. Indeed, the gene expression profiling of parental and CDDP-R cells (Fig. S2G) followed by gene  
178 set enrichment analysis (GSEA) using ‘Hallmark genes set’ collection, revealed that the “EMT gene  
179 signature” was the highest one significantly enriched in cisplatin resistant cells (Fig. S2H-I, Table S3A).  
180 Lastly, we observed a reduced proliferation rate and a higher migratory/invasive capability of CDDP-R  
181 cells (Fig. S2J-L).

182 In line with the above observations, miR-455-5p was significantly downregulated after acquisition of  
183 cisplatin resistance in CDDP-R vs. parental cells (Fig. 4E). We, therefore, transfected miR-455-5p in  
184 both parental and CDDP-R cells (Fig. 4F) and performed cell viability analysis upon cisplatin treatment  
185 (Fig. 4G). Strikingly, miR-455-5p overexpression in CDDP-R cells induced cisplatin sensitivity both in  
186 terms of potency and efficacy when compared to parental cells or parental cells overexpressing miR-455-  
187 5p (Fig. 4G-H), thus suggesting a specific miR-455-5p-addiction in resistant cells.

188 We validated such findings also *in vivo* by using a zebrafish cell derived xenograft (zCDX) model which  
189 was recently shown to be valuable in oncology research [23,24]. First, parental and CDDP-R cells  
190 overexpressing miR-455-5p or not, as a control, were fluorescently labeled and then injected into the  
191 perivitelline space of zebrafish larvae (Fig. 4I). qRT-PCR analysis confirmed miR-455-5p OE before cell



192 inoculation (Fig. S3A). Next, zebrafish embryos were treated with cisplatin at a dose near to  $C_{max}$   
193 ( $\sim 16\mu\text{M}$ ) and tumor growth analyzed (Fig. 4I-J). Implantation rate was 100% in both cell lines upon  
194 injection (at day 0), with parental cells that formed slightly smaller tumors when compared to tumors  
195 formed by CDDP-R cells (Fig. S3B-C). The cisplatin treatment induced a significant reduction in the  
196 tumor size of the parental tumors but not of the CDDP-R ones (Fig. 4K-L). Strikingly, miR-455-5p  
197 overexpression re-sensitized CDDP-R tumors to cisplatin (Fig. 4K-L). Yet, miR-455-5p OE alone caused  
198 a significant reduction of the tumor burden in CDDP-R untreated resistant tumors (Fig. 4K-L). This is in  
199 line with *in vitro* data where miR-455-5p OE impaired tumor cell proliferation (Fig. S4A-B) and with  
200 the observation that high miR-455-5p expressing tumors from TGCA-LUAD cohort are smaller in size  
201 when compared to low miR-455-5p ones (Table S4).

202

### 203 **PD-L1 is a direct molecular link between miR-455-5p and cisplatin resistance**

204 We then asked which molecular mechanisms can be influenced by miR-455-5p and their role in cisplatin  
205 resistance. To tackle this, we reconstructed miRNA-mRNA transcriptional networks by performing  
206 transcriptome analysis of LNmetS (MED-samples) which identified 1702 differentially expressed genes  
207 (DEGs) (fold change  $>|1.5|$ ;  $p < 0.05$ ) in pN2 vs. pN0 patients (Fig. 5A). GSEA using a curated gene set  
208 representing miR-455-5p predicted target genes ( $n=349$ , Data File 3; see Methods) revealed a positive  
209 enrichment ( $\text{FDR} < 0.05$ ) of miR-455-5p targets in pN2 patients which was coherent with previously  
210 observed loss of miR-455-5p expression (Fig. 5B). Next, we used the ‘Hallmark genes set’ collections  
211 in GSEA which revealed a number of pathways involved in the regulation of proliferation, metabolism,  
212 immune evasion, development and response to cellular stresses, enriched in LNmetS of pN2 patients  
213 ( $\text{FDR} < 0.05$ ) (Fig. 5C, Table S3B). To functionally dissect regulation of pN2-enriched pathways, we  
214 transfected NCI-H1993 and CDDP-R cells with a miR-455-5p mimic (OE) or a negative mimic control  
215 (CTRL) and performed transcriptome analysis. GSEA confirmed the modulation of miR-455-5p target

216 genes upon miRNA overexpression (Fig. 5B). Strikingly, comparative analysis of significantly enriched  
217 ‘Hallmark gene sets’ (FDR<0.05) in MED-samples and in the two NSCLC cell lines (NCI-H1993 and  
218 CDDP-R) revealed that ‘INTERFERON-ALPHA (IFN- $\alpha$ ) RESPONSE’ and ‘INTERFERON-GAMMA  
219 (IFN- $\gamma$ ) RESPONSE’ were overlapping and enriched in LNmets of pN2 patients likewise in low-miR-  
220 455-5p expressing NSCLC cell lines with the same trend of regulation (Fig. 5C-E, Table S3B-D). Next,  
221 we looked among genes belonging to IFN- $\alpha$  and IFN- $\gamma$  response pathways to search for putative miR-  
222 455-5p target genes by TargetScan analysis [25]. *BATF2*, *CMPK2*, *IRF2*, *MYD88*, *SOCS3* and *PD-L1*  
223 (aka *CD274*) genes were all predicted to be targeted by miR-455-5p (Fig. 5F). Among these genes, PD-  
224 L1 expression was previously reported to be found increased after NACT treatment in NSCLC. [26–28].  
225 Moreover, besides the well-known role of PD-L1 in the regulation of T cell activity through the  
226 interaction with the receptor PD-1, it was also found to regulate critical functions of cancer cells in a cell  
227 autonomous way, including chemotherapy resistance [29,30]. Therefore, we speculated that miR-455-5p  
228 regulation would impact chemotherapy response through PD-L1 direct regulation. Overall, we analyzed  
229 PD-L1 expression (mRNA, total and cell-surface protein) in our panel of NSCLC cell lines (Fig. S5A-  
230 C) and found that a higher expression of PD-L1 was associated with cisplatin resistance (Fig. S5D-E).  
231 Furthermore, when we silenced PD-L1 expression by siRNAs in NCI-H1993 cells the sensitivity to  
232 cisplatin increased significantly (Fig. S5F-H). Conversely, the acquisition of cisplatin resistance was  
233 accompanied by a concomitant increase of PD-L1 expression in CDDP-R when compared to parental  
234 cells (Fig. S6A-C). Accordingly, silencing of PD-L1 by siRNAs in CDDP-R cells (Fig. S6D) was able  
235 to strongly enhance cisplatin sensitivity when compared to control cells (Fig. S6E-F), whilst no effect  
236 was scored in the parental cell lines where PD-L1 expression was low (Fig. S6E-F).

237

238 **miR-455-5p/PD-L1 axis contributes to cisplatin resistance in lung metastatic cells**

239 We then searched for predicted miRNA-binding sites in the 3' untranslated region (3'-UTR) of *PD-L1*  
240 (aka *CD274*) which revealed a binding site (8-mer) for miR-455-5p (Fig. 5F and 6A). Indeed, we found  
241 an inverse correlation between miR-455-5p expression and PD-L1 protein amount in our panel of  
242 NSCLC cell lines (Fig. 6B). Yet, PD-L1 mRNA levels were found to be strongly upregulated in LNmets  
243 of pN2 (i.e., low miR-455-5p) vs. pN0 (i.e., high miR455-5p) patients (Fig. 6C). Remarkably, miR-455-  
244 5p expression and PD-L1 tumor proportion score showed a trend of inverse correlation also in primary  
245 NSCLC from two other independent cohorts of patients (the CSS and CIMA-CUN cohorts; Table S5;  
246 Fig. 6D-E). We also analyzed miRNA- and RNA-seq data from the TGCA-LUAD and TGCA-LUSC  
247 cohorts ( $N_{LUAD}=507$ ,  $N_{LUSC}=473$ ; Fig. 6F). When tumor samples were stratified based on the miR-455-  
248 5p expression level ('High', 'Int' and 'Low'; see Methods) we observed an inverse correlation between  
249 miR-455-5p and PD-L1 expression (Fig. 6F). Lastly, we investigated miR-455-5p and PD-L1 association  
250 in a publicly available dataset of NSCLC patients after chemotherapy treatment ( $N=131$ , [31]; Fig. S8  
251 A-C; see also Supplementary Methods). GSEA using a curated gene set representing miR-455-5p  
252 predicted target genes ( $n=349$ , Data File 3; see Methods) revealed a positive enrichment ( $FDR<0.05$ ) of  
253 miR-455-5p targets in high PD-L1 chemoresistant NSCLC (Fig S8A). Notably, miR-455 gene is located  
254 within the intron of *COL27A1* gene [32], thus we used *COL27A1* expression as a surrogate of miR-455-  
255 5p expression as we previously showed [33]. Strikingly, we found that there was a significant negative  
256 correlation between *COL72A1* and *CD274* expression (Fig. S8B-C) which further corroborated that a  
257 high PD-L1 expression was usually associated to a lower miR-455-5p expression in chemoresistant  
258 NSCLC. Next, we transfected NCI-H1993 and CDDP-R cells with miR-455-5p mimic and analyzed PD-  
259 L1 expression *in vitro*: miR-455-5p OE decreased the level of cell-surface PD-L1 protein of NCI-H1993  
260 and CDDP-R cells (Fig. 6G), while such effect was negligible in low-PD-L1 expressing parental cells  
261 (Fig. 6G). Importantly, similar results were obtained when we forced the expression of miR-455-5p in a  
262 primary LNmets cell line (i.e., the EBUS-52 cell line) established in our lab (Fig. 6G) (see Methods). To

263 test the direct effect of miR-455-5p on PD-L1 expression regulation, we took advantage of custom-  
264 designed oligonucleotides (target site blockers; TSBs) that specifically prevent the binding of miR-455-  
265 5p to the *PD-L1* 3'-UTR. Transfection of TSBs in CDDP-R cells rescued PD-L1 loss of expression upon  
266 miR-455-5p OE (Fig. 6H). Strikingly, the rescue of PD-L1 expression upon TSB transfection resulted in  
267 the recovery of cisplatin resistance of CDDP-R/miR-455-5p OE cells (Fig. 6I), thus suggesting that miR-  
268 455-5p regulates cisplatin response in a PD-L1 dependent manner.

269 In cancer, PD-L1 expression is induced upon exposure to interferons produced by activated Natural Killer  
270 (NK) and T cells in the TME [34,35]. We herein showed the enrichment of IFN- $\alpha$  and IFN- $\gamma$  response  
271 pathways in low-expressing miR-455-5p cells and LN mets from pN2 patients (Fig. 5D-E). Thus, we  
272 asked whether miR-455-5p OE could affect IFN-mediated induction of PD-L1 expression. In line with  
273 our hypothesis, miR-455-5p OE was able to attenuate IFN- $\gamma$  mediated PD-L1 upregulation both in  
274 parental and CDDP-R cells (Fig. 6J). Since PD-L1 expression in tumor cells can be influenced by the  
275 aberrant activation of oncogenic signals, such as MYC, ALK, MEK-ERK, RAS and EGFR [36], and that  
276 miR-455-5p was reported to directly regulate the EGFR expression [37], we then investigated whether  
277 miR-455-5p could interfere with the EGF mediated PD-L1 expression. Interestingly, miR-455-5p OE  
278 was able to reduce the EGFR and PD-L1 expression independently of the EGF stimulation, both in  
279 normal bronchial epithelial cells (i.e., BEASB-2B) (Fig. 6K) and in NCI-H1975 lung cancer cells (which  
280 express high levels of PD-L1 due to presence of the L858R/T790M double activating mutations of *EGFR*  
281 [38]) (Fig. 6L). Notably, miR-455-5p was also predicted to target IRF2 (Fig. 5F), a well-known  
282 transcriptional repressor of PD-L1 expression [39,40]. Indeed, we found that miR-455-5p overexpression  
283 strongly reduced IRF2 expression (Fig. S9A-B) which suggests an additional miR-455-5p/IRF2 axis  
284 potentially functioning as a regulator of miR-455-5p/PD-L1 mechanism (Fig. S9C), a possibility which  
285 warrants further investigation.

286

## 287 **miR-455-5p overexpression decreases T-cell apoptosis**

288 The interaction of PD-L1 with its cognate receptor PD-1 inhibits the proliferation and activation of T  
289 cells [36]. Therefore, we asked ourselves whether miR-455-5p-dependent PD-L1 regulation in tumor  
290 cells may impact T cells viability. To this purpose, we took advantage of Jurkat cells, a leukemic T cell  
291 line widely used in the literature for T cell signaling studies [41]. NCI-H1975 cells (miR-455-5p OE or  
292 CTRL) were co-cultured for 72 hours with Jurkat cells in the presence of CD3/CD28/CD2 soluble  
293 antibody complexes to induce activation and PD-1 expression on the T cell surface (Fig. 7A). Strikingly,  
294 miR-455-5p OE decreased the percentage of apoptotic T cells when compared to T cells co-cultured with  
295 NCI-H1975 CTRL cells (Fig. 7B-C; Fig. S7A). Likewise, we observed a significant reduction of  
296 apoptotic T cells when we directly silenced PD-L1 in NCI-H1975 (Fig. 7B-C; Fig. S7A). Next, we  
297 analyzed the correlation of miR-455-5p expression with CD8 T cell infiltration in two independent  
298 cohorts of primary NSCLC tumors (the CSS and CIMA-CUN cohorts; Table S6; Fig. 7D-E). The analysis  
299 revealed a positive correlation between miR-455-5p expression and the percentage of CD8 T cells in  
300 high tumor-infiltrating lymphocytes (TILs) tumors (Fig. 7D-E). Strikingly, when we performed a pooled  
301 analysis (n=47) by combining the two cohorts, we confirmed that higher level of miR-455-5p was  
302 associated to a higher infiltration of CD8 T cells (Fig. 7 F). Furthermore, we leveraged the TCGA-LUAD  
303 and -LUSC datasets to grasp further information about CD8 T cells subsets infiltration in NSCLC  
304 samples high-/low-miR-455-5p expressing: i) TCGA samples were stratified in ‘High’, ‘Int’ and ‘Low’  
305 miR-455-5p expressing samples (see Methods); ii) PD-L1 expression likewise expression signatures  
306 related to CD8 exhausted T cells [42] and of IFN response were analyzed in High/Int/Low miR-455-5p  
307 tumor subsets (Fig. 7G; see Methods). Strikingly, the expression levels of miR-455-5p were inversely  
308 correlated to signatures of enriched exhausted CD8+ T cell (aka GET) and of IFN response (Fig. 7G) in  
309 LUAD tumors, thus further reinforcing the link among miR-455-5p, PD-L1 and impact on T cells  
310 viability. Lastly, the analysis of the distribution of ‘Immune Subtypes’ introduced by Thorsson et al. [43]

311 revealed, in LUAD low-miR-455-5p expressing samples, a depletion of the ‘inflammatory subtype (C3)  
312 (enriched in pro-inflammatory T helper Th1 and Th17 cells) which enhances CD8+ T cells cytotoxicity  
313 (Fig. 7G). Contrariwise, the miR-455-5p expression had no effects on the immune subtypes of LUSC  
314 tumors which, by and large, showed a distinct immune composition in comparison to LUAD tumors due  
315 to the predominance of the C2 subtype and the absence of the C3 subtype (Fig. 7G). Notably, when we  
316 analyzed N2 metastasis by the CIBERSORTx algorithm [44], we found that pN2 MED-samples were  
317 characterized by a trend in the reduction of cytotoxic cells, such as NK activated cells and T cell CD8,  
318 which was in line with our previous observations (Fig. S10A, Table S7). Moreover, pN2 and pN0  
319 metastases were also characterized by varying expression levels of MHC and immune-inhibitors  
320 molecules (Fig. S10B).

321 Overall, these data suggest that miR-455-5p-dependent inhibition of PD-L1 expression may affect CD8  
322 T cell phenotype thus improving T cell antitumor immune response.

323

## 324 **DISCUSSION**

325 Patients with locally-advanced lung cancer treated by NACT in combination with surgery had a better  
326 survival than patients treated by surgery alone, in randomized trials [45]. However, response rate to  
327 NACT is still suboptimal due to the clinical and biological heterogeneity of lung tumors. Recent  
328 improvements have been made by introducing the use of ICI (e.g., nivolumab, pembrolizumab,  
329 atezolizumab; [46–48]) in combination with cisplatin-based chemotherapy, to trigger the immune  
330 response against primary and metastatic lung cancer lesions [49]. Yet, the prediction of  
331 chemo/immunotherapy response as well as the identification of mechanisms of resistance in metastatic  
332 lung cancer patients is still an unmet need [50].

333 In recent years microRNAs have emerged as master regulators of critical processes for lung cancer onset  
334 and progression [51]. Their role in driving lung cancer was found to be overall exerted through the

335 expression regulation of targeted cancer-driver genes [51] and the modulation of complex cancer  
336 epigenetic mechanisms which impact tumor cells fitness by, for example, inducing EMT [52], stemness  
337 [53], immune evasion [54], and resistance to chemotherapy [55]. Furthermore, the exceptional stability  
338 of miRNA in harsh conditions and their presence in the body fluids [56] make them ideal candidates for  
339 the development of diagnostic, prognostic and predictive biomarkers [57,58].

340 Here, we performed a transcriptome analysis (miRNA and mRNA profiling) of LNmet of a cohort of  
341 patients with stage IIIA lung tumors by molecular profiling of EBUS and mediastinoscopy samples. We  
342 showed that N2 metastases resistant to NACT were characterized by an overall loss of miRNAs  
343 expression consistently with their prevalent role as tumor suppressors [59], as well as a profound reshape  
344 of the coding transcriptome. Our identified miRNA-based signatures (aka LN-signature) were accurate  
345 enough to predict NACT response which, to our knowledge, are the first of this kind and will warrant  
346 further investigations in larger and multicentric cohorts of patients.

347 Importantly, we unveiled that the miR-455-5p/PD-L1 axis regulates chemotherapy response of NSCLC  
348 cells, hallmarks metastases with active IFN- $\gamma$  response pathway (an inducer of PD-L1 expression;[34]),  
349 and impacts T cells viability and relative abundances in TME (Fig. 7H). Remarkably, when we  
350 investigated the expression profile of miR-455-5p and correlated it with cisplatin sensitivity metrics, we  
351 found that loss of expression of miR-455-5p hallmarked intrinsic chemoresistance of NSCLC cell lines.  
352 This was in line with the miR-455-5p regulation in EBUS- and MED-samples which strongly suggested  
353 the relevance of miR-455-5p in controlling mechanisms of intrinsic and acquired chemoresistance.  
354 Indeed, we showed that miR-455-5p OE was sufficient to restore cisplatin sensitivity both *in vitro* and  
355 *in vivo*.

356 Several mechanisms involving drug accumulation, drug efflux and mediators of response to DNA  
357 damage have been implicated in platinum resistance so far [60]. Recently, PD-L1 was shown to regulate  
358 intracellular functions of cancer cells in a cell-autonomous way beside its immune-suppressive role on

359 the membrane, including the regulation of cisplatin resistance [29,30]. NSCLC tumors treated with  
360 chemotherapy express higher levels of PD-L1 which, in turn, correlate with resistance and poor prognosis  
361 [26,27,61]. In keeping with this, we observed that PD-L1 expression is increased in resistant cells (both  
362 at basal level and upon cisplatin treatment) and direct inhibition of PD-L1 expression sensitize cells to  
363 cisplatin treatment. Importantly, we found that miR-455-5p directly targets PD-L1 in lung cancer cells  
364 and inhibits its expression thus contributing to response to cisplatin treatment. Intriguingly, other  
365 miRNAs of our LN-signature (i.e. miR-140-3p, miR-324-5p, miR-15b-5p and miR-93-5p) target PD-L1  
366 [62] which further enforces the role of PD-L1 in NACT response in stage IIIA patients.

367 miR-455-5p expression has been found dysregulated in several human malignancies including colon  
368 cancer, hepatic cancer, NSCLC, gastric cancer and prostate cancer [63–67]. Recently, a work by Chen et  
369 al. has reported that miR-455-5p is able to regulate cisplatin resistance in bladder cancer via the HOXA-  
370 AS3–miR-455-5p–Notch1 axis [68]. However, in our study, neither the *HOXA-AS3* nor the *NOTCH1*  
371 expressions were found modulated upon miR-455-5p OE *in vitro* or in N2 metastases (Fig. S11 A-B).  
372 As a matter of fact, we noticed that the miR-455-5p overexpression resulted in either minor or no effect  
373 on cisplatin sensitivity in low PD-L1 expressing cells, thus highlighting the role of PD-L1 as a central  
374 mediator of the miR-455-5p activity in the context of drug resistance in NSCLC. A recent study  
375 suggested that miR-455-5p could target PD-L1 3'UTR in hepatocellular carcinoma cells [69]. However,  
376 the validation of the miRNA binding site in the PD-L1 gene was carried out only in a unphysiological  
377 context (e.g. luciferase-based assay) and was not even confirmed in real-world cohort of patients.  
378 Moreover, no data were presented about the role of miR-455-5p/PD-L1 axis in the regulation of cisplatin  
379 response and cancer immune evasion.

380 The binding of tumor PD-L1 with the receptor PD-1 on T cells activates a signaling cascade that alters  
381 the T cell activity in many ways, including the inhibition of T cell proliferation and survival, cytokine  
382 production and other effector functions [36]. Therefore, we expect that miR-455-5p-PD-L1 axis may



383 have also a role in a non-cell-autonomous way by regulating cancer immune-evasion in LNmets of stage  
384 IIIA patients. As a matter of fact, we showed that LNmets, which express low level of miR-455-5p, are  
385 characterized by a higher amount of both PD-L1 and PD-1 mRNA together with a trend of reduction of  
386 CD8 T cells, as we predicted *in silico* by CIBERSORTx analysis. Although an immunohistochemistry  
387 (IHC) analysis of LNmets to measure PD-L1, PD-1 and T cell markers was not feasible due to limited  
388 amount of samples, we showed in primary NSCLC tumors that higher level of miR-455-5p was  
389 associated with decreased PD-L1 expression and increase in CD8+ T cell infiltration, in line with our  
390 hypotheses. Recently, FDA approved neoadjuvant nivolumab plus p-doublet chemotherapy in resectable  
391 NSCLC regardless of PD-L1 tumor status [9]. Despite PD-L1 expression modulation was associated to  
392 immunotherapy response [70], PD-L1 has not been considered as reliable biomarkers mainly due to its  
393 spatial and temporal heterogenous expression [71] with PD-L1 negative tumors which responded also to  
394 ICIs [72]. However, GSEA analysis revealed that N2 metastases were enriched in a set of genes  
395 belonging to IFN- $\gamma$  signature. IFN- $\gamma$  is a proinflammatory cytokine produced by T cell and NK cells and  
396 is able to increase PD-L1 levels in cancer cells, thus promoting the inhibition of the T cell activity in the  
397 TME [73]. Moreover, IFN- $\gamma$ -related gene signatures have been recently reported to predict the response  
398 to anti-PD-1 therapy in melanoma [74] and NSCLC patients [75]. Interestingly, our data indicate that  
399 miR-455-5p overexpression *in vitro* is able to decrease both IFN- $\gamma$ -mediated PD-L1 expression and the  
400 enrichment in IFN- $\gamma$  related genes observed in resistant cells, which deserves further investigations to  
401 explore the role of miR-455-5p and the overall LN-signature as potential reliable biomarkers to predict  
402 the response to ICIs. Moreover, given the ability of miRNA-based LN-signature to accurately predict  
403 NACT response, such signature could also be exploited in future studies as a potential biomarker for the  
404 newly approved drug regimen based on ICIs plus NACT.

405 Further studies have also highlighted a high tumor heterogeneity between metastatic lesions and primary  
406 tumors in the same NSCLC patients both in terms of pathway activation and PD-L1 expression [76],  
407 which may impact chemotherapy and immunotherapy response.

408 Although a direct comparison between nodal metastases and primary tumors was unfeasible in our  
409 cohorts, our data represent an important step forward in understanding the molecular mechanisms driving  
410 chemoresistance in lung cancer metastatic cells. Furthermore, we provided evidences for an unedited  
411 contribution of the miR-455-5p-PD-L1 axis in the regulation of chemoresistance and immunoevasion at  
412 the level of lymph nodal metastases, thus adding new grounds for bringing chemo-immunotherapy a step  
413 closer to stage IIIA clinical practice.

414

## 415 **CONCLUSIONS**

416 Here, we showed that treatment naïve LNmets were characterized by distinct miRNA expression patterns  
417 which were predictive of NACT response. Importantly, by coupling whole-miRNA and mRNA profiling,  
418 we unveiled a key role for the miR-455-5p/PD-L1 axis which regulates chemotherapy response and  
419 immune evasion in metastatic NSCLC cells. To our knowledge, our study represents the most  
420 comprehensive transcriptome (coding and non-coding) analysis of LNmets in NSCLC patients. In  
421 conclusion, we described novel miRNA-based biomarkers and unveiled relevant mechanisms for  
422 LNmets resistance to chemotherapy which will contribute to improve outcome of lung cancer patients.

423

## 424 **METHODS**

### 425 **Tumor sample collection and processing**

426 EBUS samples: samples were obtained and processed as previously described [11]. EBUS-TBNA  
427 samples were collected from the mediastinal LNs station 4 and 7 of patients using a convex-probe (EBUS  
428 Convex Probe BF-UC180F; Olympus), a dedicated ultrasound processor (EU-ME2; Olympus) and a 22-

429 gauge dedicated needle (Vizishot NA-201SX-4022; Olympus). One dedicated needle passage was put  
430 into cell culture medium for primary cell cultures expansion. Briefly, EBUS-TBNA samples were  
431 centrifuged for 5 min at 1,000 g at RT, resuspended in complete medium [11] and cultured on collagen-  
432 I rat tail (Gibco) coated plates for 6 to 12 days prior to total RNA extraction (Table 1). For long term  
433 expansion, primary cell cultures were expanded in Pneumacult Basal Ex (Stemcells technologies). EBUS  
434 cell line used for transfection experiments was derived from LN mets of a 54 years old female with lung  
435 adenocarcinoma. Criteria for selection of patients were: i) pathologically confirmed stage IIIA-pN2  
436 NSCLC; ii) not having been treated before for their disease; iii) suitability for NACT followed by  
437 surgery.

438 MED samples: Two FFPE tissue sections (5–10µm thick) on glass slides with adequate tumor cellularity  
439 (>60%) were selected by a certified pathologist and microdissected by scraping with a scalpel prior to  
440 RNA isolation as previously described [11] (Table S2). Criteria for selection of patients were: i)  
441 pathologically confirmed stage IIIA-pN2 NSCLC; ii) not having been treated before for their disease; iii)  
442 suitability for NACT followed by surgery.

443 CIMA-CUN and CSS cohorts: tumor samples were obtained from NSCLC patients who underwent  
444 surgical resection at Clínica Universidad de Navarra (Pamplona, Spain) (CUN) and at the Casa Sollievo  
445 della Sofferenza Research Hospital (San Giovanni Rotondo, Italy) (CSS), respectively. Inclusion criteria  
446 were: i) absence of cancer within the previous five years; ii) complete resection of the primary tumor;  
447 iii) no adjuvant therapy prior to surgery. Tumors were classified according to the WHO 2004  
448 classification and the 8<sup>th</sup> TNM edition was used for tumor staging. RNA was extracted from one to two  
449 FFPE tissue sections (5µm thick) on glass slides with adequate tumor cellularity (>60%), selected by a  
450 pathologist. See also Table S5 and Table S6.

451

452 **Cell lines**

453 NCI-H2023, NCI-H1993, NCI-H1975, NCI-H838, NCI-H1944, NCI-H1437, NCI-H1573, NCI-H2126,  
454 NCI-H322M, BEAS-2B and Jurkat were obtained from ATCC and cultured in RPMI (Gibco) with 5%  
455 FBS, 1% penicillin/streptomycin except for Jurkat medium, which was supplemented with 10% FBS.  
456 Primary cell cultures from LN mets of stage IIIA NSCLC were obtained and maintained as previously  
457 described [11]. All cell lines were grown at 37°C in a humidified incubator with 5% CO<sub>2</sub> and routinely  
458 tested for Mycoplasma contamination using PCR.

459

#### 460 **Creation of cisplatin resistant cells (CDDP-R)**

461 Cisplatin (P4394, Sigma-Aldrich) was dissolved in vehicle solution (NaCl 0.9%) at a final concentration  
462 of 1 mg/ml and stored in the dark at RT for a maximum of 28 days. NCI-H2023 cells were subjected to  
463 treatment cycles (n=11), consisting of 3-4 days of cisplatin treatment and 1-2 weeks of culture in RPMI  
464 5% FBS 1% penicillin/streptomycin to allow survived cells (i.e., the CDDP-R) to proliferate. The dose  
465 at the first treatment cycle was 0.6 µM then increased in subsequent cycles until reaching a maximum  
466 dose of 10 µM. Parental cells treated with vehicle solution were cultured in parallel and used as a control.  
467

#### 468 **Cell viability assay**

469 Cells were seeded in 96-well plates in triplicate in 90 µl of complete media. At day 1 post seeding, cells  
470 were treated with increasing doses of cisplatin (3-fold serial dilution), or vehicle solution as a control.  
471 Cell viability was assessed by adding CyQUANT Cell Proliferation Assay Kit (Life Technologies) in a  
472 ratio of 1:10 directly in complete media. Fluorescence was measured at 480/528nm using a Sinergy HT  
473 (Biotek) microplate reader and IC<sub>50</sub> was estimated using the online tool GR calculator [77].

474

#### 475 **Cell transfection experiments**

476 All transfection experiments were carried out by performing reverse transfection with Lipofectamine  
477 RNAiMAX (Thermofisher Scientific) according to the manufacturer's instructions. The following oligos  
478 at the indicated concentration were used: 5nM of miR-455-5p mimic (MSY0003150, Qiagen) or  
479 recommended All Stars negative control siRNA (cat. 1027281, Qiagen); 7.5nM of PD-L1-specific miR-  
480 455-5p TSB (339194; sequence: GTAGACTATGTGCCTTTGCTCAG; Qiagen) or scramble TSB  
481 (339194; sequence: ACGTCTATACGCCCA; Qiagen); 10nM of siRNA against *CD274* (HSS120932,  
482 Thermofisher scientific) or recommended Stealth RNAi negative control Med GC (12935-300,  
483 Thermofisher scientific).

484

#### 485 **Jurkat T cell apoptosis assay**

486 Transfected NCI-H1975 were seeded overnight to allow them to adhere to culture plates. The day after,  
487 tumor cells were stimulated with 40ng/ml of IFN- $\gamma$  for 8 hours and then co-cultured with Jurkat cells in  
488 the presence of Immunocult human CD3/CD28/CD2 T cell activator (Stemcells technologies) at a Jurkat  
489 cells to NCI-H1975 ratio of 1:4. After 72 hours, Jurkat cells were recovered from the co-culture and  
490 analyzed by AnnexinV-488 (Thermofisher) and 7-AAD (BD Pharmingen) staining in a BD FACS  
491 CANTO Cytometer. Gating strategy used to analyze apoptosis was reported in Fig. S7.

492

#### 493 **Total RNA (including small RNA) isolation**

494 Total RNA from commercial cell lines, EBUS samples and MED samples was isolated using respectively  
495 miRNeasy kit, AllPrep DNA/RNA/miRNA Universal Kit and AllPrep DNA/RNA FFPE Kit,  
496 respectively, according to the with manufacturer's instructions. Total RNA quantification was carried  
497 out using the NanoDrop® ND-1000 spectrophotometer or Qubit RNA HS Assay Kit (Invitrogen).

498

#### 499 **Quantitative Real Time-PCR (qRT-PCR) of miRNAs and mRNAs**

500 For qRT-PCR of miRNAs, 10 ng of total RNA were reverse transcribed using a TaqMan MicroRNA  
501 Reverse Transcription Kit (ThermoFisher Scientific) and RT specific primers for miRNAs  
502 (ThermoFisher Scientific, See Table S9). 2.5 uL of RT product were pre-amplified for 14 cycles using  
503 the TaqMan PreAMP Mastemix and miRNA Taqman assay (see Table S9). The expression levels of  
504 miRNAs were normalized to the housekeeping gene U6 snRNA. For qRT-PCR of transcripts of  
505 commercially available cell lines, 1 ug of total RNA was reverse-transcribed using a High Capacity  
506 cDNA Reverse Transcription Kit (ThermoFisher Scientific) according to manufacturer instructions. For  
507 qRT-PCR of transcripts of EBUS and MED samples, 200 ng of total RNA were reverse transcribed with  
508 the SuperScript VILO cDNA Synthesis Kit (Thermo Fisher Scientific) in 20  $\mu$ L of final volume and then  
509 cDNA was pre-amplified for 10 cycles. cDNA was amplified with the TaqMan Gene Expression assay  
510 (ThermoFisher Scientific, See Table S9) and QuantStudio 12k Flex thermocycler (ThermoFisher  
511 Scientific) using the manufacturer's recommended cycling conditions. Data were normalized using the  
512 geometric mean of 3 genes (ESD1, GUSB and HPRT) as reference. Data normalization for both miRNAs  
513 and mRNAs was performed by using the delta-delta CT method or the calculation of the normalized Cq  
514 as previously described [78].

515

### 516 **Whole miRNA expression profile**

517 10 ng of total RNA was reverse transcribed with Megaplex<sup>TM</sup> miRNA-specific stem-loop RT Primers  
518 Human Pool A v 2.1 (Thermo Fisher Scientific) and TaqMan<sup>®</sup> MicroRNA reverse transcription kit  
519 (Thermo Fisher Scientific) according to the manufacturer's instructions. 5  $\mu$ L of reverse transcribed  
520 product were pre-amplified for 14 cycles using the TaqMan PreAMP Mastemix and Megaplex PreAMP  
521 primers Pool A v 2.1 according to the manufacturer's instructions (Thermo Fisher Scientific). The PCR  
522 reaction was performed using the TaqMan Universal Master Mix II, No AmpErase UNG (Thermo Fisher  
523 Scientific) by loading 100  $\mu$ L of the pre- amplified mixture (final dilution 1:200) in each of the eight

524 lanes of the TaqMan® Low Density Array miRNA Panel A v 2.0 (Thermo Fisher Scientific). Real-Time  
525 PCR was carried out on the QuantStudio 12k (Thermo Fisher Scientific) according to the manufacturer's  
526 cycling conditions and by setting an automatic threshold. Cq data of miRNAs were normalized (Cqn)  
527 using U6 snRNA as previously described [78]. miRNAs with a Cq<30.01 in at least 50% of samples  
528 among one of the experimental groups tested in the analysis, were considered as detected.

529

### 530 **Zebrafish cell-derived xenograft (zCDX)**

531 zCDX models were developed by a CRO (BioReperia AB). Transgenic Tg(fli1:EGFP)y1 zebrafish  
532 embryos were raised at 28°C for 48 hours in E3 embryo medium (containing per liter: 0.286g NaCl,  
533 0.048g CaCl<sub>2</sub>, 0.081g MgSO<sub>4</sub> and 0.0126g KCl with 0.2 mM 1-Phenyl-2-Thiourea aka PTU). At 2 days  
534 post fertilization, embryos were injected subcutaneously in the perivitelline space with transfected  
535 parental and CDDP-R cells previously labeled with FAST DiI™ oil (ThermoFisher Scientific) and  
536 treated with ± Cisplatin 5 mg/L for 3 days. Images of tumors were taken by using a fluorescent  
537 stereoscope with a K5 camera (Leica) and LAS X software v3.7.1.21655 at 100x magnification with no  
538 binning. Images of tumors were taken right after injection (day 1) and after drug treatment (day 4).  
539 Images were automatically analyzed by using the HuginMunin software v2.7.0.0 (BioReperia AB).  
540 Tumor growth regression was calculated by dividing the number of tumor pixels at day 4 by the number  
541 of tumor pixels at day 1 in the same embryo and multiplied by 100.

542

### 543 **Genome-wide expression profiling**

544 Gene expression profiling of MED samples and NSCLC cell lines (two independent biological replicates)  
545 was carried out using the GeneChip® Pico reagent Kit and the GeneChip® WT Plus reagent Kit,  
546 respectively. For both reagents, the GeneChip® Human Clarion S Array (Thermofisher Scientific) was  
547 used according to the manufacturer's instructions. Quality control, normalization of CEL files and

548 statistical analysis were performed using the Transcriptome Analysis Console (TAC) software v4.0  
549 (Thermo Fisher Scientific) by performing the “Gene level SST-RMA” summarization method with  
550 human genome version hg38. Differentially expressed genes were defined as those with a fold-change  
551 (FC) difference of at least 1.5 and a p-value less than 0.05. For MED samples, 5 pN2 and 5 pN0 samples  
552 balanced for age, sex and histotype were pooled to obtain 2 pools for each experimental condition (pN2  
553 and pN0). Microarray expression data can be found at GEO database (GSE193707; reviewer token:  
554 qtsheiycfpsvxsr).

555

### 556 **Predictive risk model**

557 A ridge-penalized unconditional logistic regression was applied in the training set to model the odds of  
558 responding as function of the 16-miRNAs that were scored as differentially expressed between responder  
559 and non-responder patients in the EBUS-samples (16 miRNA model). The same strategy was used for  
560 the 14-miRNA and 4-miRNA models. Cross-validated (10-fold) log-likelihood with optimization (50  
561 simulations) of the tuning penalty parameter was applied. Probability of being responder was estimated,  
562 and model performance was assessed using the area under the receiver operating curve (AUC). Min-max  
563 scaling of miRNAs expression in the validation set was implemented before applying the predictive  
564 model. LASSO approach was used to reduce the number of predictors.

565

### 566 **Analysis of cell line publicly available datasets**

567 Cell viability of cisplatin for the indicated dataset was downloaded directly from the Depmap portal  
568 (<https://depmap.org/portal/compound/cisplatin?tab=dose-curves>). Analysis of cell viability data was  
569 restricted only to NSCLC cell lines for which miRNA expression data was available in the CCLE dataset.  
570 Median cell viability was calculated at each concentration and plotted. Quality control (QC) for IC<sub>50</sub>  
571 estimation was applied following instructions reported in Sebaugh et al. [79]. Briefly, we estimate IC<sub>50</sub>



572 values for cell lines in each dataset by taking advantage of cell viability data downloaded from Depmap  
573 portal and the online software ‘GR calculator’. QC criteria applied were: at least two concentrations  
574 below the 50% response concentration and above the 50% response. Only proportions of cell lines in  
575 each dataset for which IC<sub>50</sub> estimation was accurate according to Sebaugh et al. were reported (see Table  
576 S2).

577

### 578 **CIBERSORTx analysis**

579 CIBERSORTx [44] was run using the online web-tool (<https://cibersortx.stanford.edu>) and following the  
580 developers’ instructions. The CIBERSORTx analysis was conducted using the following settings: LM  
581 22 as signature matrix file, absolute mode running and 100 permutations. CIBERSORTx score is an  
582 estimation of cell fraction of each specific subpopulation in each tumor sample. CIBERSORTx complete  
583 results were reported in Table S7.

584

### 585 **Gene Set Enrichment Analysis (GSEA)**

586 GSEA (GSEA, <https://www.gsea-msigdb.org/gsea/index.jsp>) was performed using Signal2Noise metric,  
587 1000 random sample sets permutation, and median gene expression values for class comparison. For  
588 enrichment analysis of hallmarks of cancer, we used the gene matrix h.all.v7.4 symbols.gmt available  
589 from MSigDB. For miR-455-5p target enrichment analysis, we built a custom gene matrix by including  
590 human genes that were highly or moderately predicted to be miR-455-5p targets (cumulative weighted  
591 context++ score ≤ -0.2) by Target Scan (release 7.2) and were well expressed (log<sub>2</sub> intensity > 4) in all  
592 samples used in each analysis. Significant gene sets were considered as those with a false-discovery rate  
593 (q-value) less than 5%. For single-sample gene set enrichment analysis of TCGA cohorts, ssGSEA scores  
594 were calculated by using the GSVA package in R. Gene signature for exhausted CD8+ T cell were

595 obtained from Cai et al. [42] while gene signatures for IFN- $\gamma$  and IFN- $\alpha$  response were downloaded from  
596 MSigDB hallmark gene sets (version h.all.v7.4 symbols.gmt).

597

## 598 **Statistics**

599 Hierarchical clustering was performed using Cluster 3.0 (C Clustering Library 1.56;  
600 <http://bonsai.hgc.jp/~mdehoon/software/cluster/software.htm>) and Java Tree View (Version 1.1.6r4;  
601 <http://jtreeview.sourceforge.net>). The uncentered correlation and centroid linkage clustering method was  
602 used. Heatmaps were obtained by using MORPHEUS (<https://software.broadinstitute.org/morpheus/>) or  
603 Java Tree View. All graphs and statistical analyses were performed using Prism (version 7.0e), SPSS  
604 (version 15.0), SAS software and R 3.3.1 (R Core Team, 2016). The normality of data was controlled by  
605 Shapiro-Wilk and D'Agostino & Pearson normality tests. The details about statistical tests, number of  
606 independent replicates (N) and definition of error bars were specified in the Fig. legends. Statistical  
607 output (p-value) was represented by asterisks as follows: non-significant (ns) > 0.05, \* $p \leq 0.05$ ,  
608 \*\* $p \leq 0.01$ , \*\*\* $p \leq 0.001$ , \*\*\*\* $p \leq 0.0001$ . A  $p < 0.05$  was considered to be statistically significant.  
609 Sample size for tissue-based assays was chosen on the basis of sample availability. The investigators  
610 were not blinded when analyzing the data except for IHC analysis and zebrafish experiments.

611

## 612 **LIST OF ABBREVIATIONS:**

613 3'-UTR: 3' untranslated region

614 ACTA2: Actin Alpha 2, Smooth Muscle

615 AUC: Area under the curve

616 CC10: Clara cell 10

617 CCLE: Cancer Cell line Encyclopedia

618 CD90: Cluster of Differentiation 90

- 619 CDDP: Cisplatin
- 620 CDH5: Cadherin 5
- 621 CTRL: Control
- 622 CTRPv2: Cancer Therapeutics Response Portal
- 623 DMSO: Dimethylsulfoxide
- 624 E-CAD: E-cadherin
- 625 EBUS-TBNA: endobronchial ultrasound transbronchial needle aspiration
- 626 EGFR: Epidermal Growth Factor Receptor
- 627 EMT Epithelial-to-mesenchymal transition
- 628 ESD1: Esterase D
- 629 FDR: False discovery rate
- 630 FFPE: Formalin fixed paraffin embedded
- 631 GAPDH: Glyceraldehyde-3-Phosphate Dehydrogenase
- 632 GDSC1-2: Genomics of Drug Sensitivity in Cancer
- 633 GET: Gene signature of exhausted CD8+ T cell
- 634 GSEA: Gene set enrichment analysis
- 635 HPRT1: Hypoxanthine Phosphoribosyltransferase 1
- 636 ICI: Immune checkpoint inhibitors
- 637 IFN- $\alpha$ : Interferon-alpha
- 638 IFN- $\gamma$ : Interferon-gamma
- 639 IHC: Immunohistochemistry
- 640 KRT5: Keratin 5
- 641 LN: Lymph node
- 642 LNmets: Lymph nodal metastases

- 643 LUAD: Lung adenocarcinoma
- 644 LUSC: Lung squamous cell carcinoma
- 645 MED: Mediastinoscopy
- 646 N-CAD: N-cadherin
- 647 NACT: Neoadjuvant chemotherapy
- 648 NES: Normalized enriched score
- 649 NK: Natural Killer
- 650 NKX2-1: NK2 Homeobox 1
- 651 NSCLC: non–small-cell lung cancer
- 652 OE: Overexpression
- 653 P-doublet: Platinum-based doublet
- 654 Pan-CK: pan-cytokeratin
- 655 PRISM: Profiling Relative Inhibition Simultaneously in Mixtures
- 656 PTPRC: Protein Tyrosine Phosphatase Receptor Type C
- 657 SFTPC: Surfactant Protein C
- 658 SLUG: Zinc finger protein SNAI2
- 659 SOX2: SRY-Box Transcription Factor 2
- 660 TILs: Tumor-infiltrating lymphocytes
- 661 TLDA: TaqMan Low-density Array
- 662 TME: Tumor-microenvironment
- 663 TSB: Target site blockers
- 664 TWIST1: Twist Family BHLH Transcription Factor 1
- 665 VIM: Vimentin
- 666 zCDX: Zebrafish cell derived xenograft

667 ZEB1: Zinc Finger E-Box Binding Homeobox 1

668

669 **DECLARATIONS:**

670 **Ethics approval and consent to participate**

671 The institutional ethical committees approved this study (registration number: R65/14-IEO76; BIO-  
672 EBUS-V1.0\_Ott19; BIO-POLMONE-V1.0\_Giu16), and informed consent was obtained from all  
673 patients enrolled.

674

675 **Consent for publication**

676 Not applicable

677

678 **Availability of supporting data**

679 All data generated or analysed during this study are included in this published article and its  
680 supplementary information files. The datasets generated during the current study (microarray expression  
681 data) are available at GEO database (GSE193707; reviewer token: qtsheiyfsvxsr). The web link to  
682 public datasets analysed during the current study are available in the materials section.

683

684 **Competing interests**

685 The authors declare that they have no competing interests

686

687 **Funding**

688 The research leading to these results has received funding from AIRC under IG 2019 - ID. 22827 project  
689 – P.I. Bianchi Fabrizio, from AIRC under MFAG-17568 – P.I. Bianchi Fabrizio; this study was also  
690 supported in part by the Italian Ministry of Health [GR-2016-02363975 and CLEARLY to F.B.; GR-

691 2019-12370460 to T.C.]. R.C. was a recipient of a fellowship from Fondazione Umberto Veronesi and  
692 of a fellowship from Fondazione Pezcoller. T.C. was a recipient of a fellowship from Associazione  
693 Italiana Ricerca sul Cancro (#19548) and of a fellowship from Fondazione Umberto Veronesi. L.M.M.  
694 was supported by FIMA, Fundación ARECES and ISCIII-Fondo de Investigación Sanitaria-Fondo  
695 Europeo de Desarrollo Regional (PI19/00098). The study funders had no role in the design of the study,  
696 the collection, analysis, and interpretation of the data, the writing of the manuscript, and the decision to  
697 submit the manuscript for publication. All authors gave their consent to publication.

698

#### 699 **Author's contribution**

700 Conceptualization: RC, FB

701 Methodology: RC, TC, ED, VM, OP, EB, FM, MB, PG, LM, CC, JG, LS, JS, AP, FB

702 Investigation: RC, TC, ED, MC, FMZ, LM, JG, LS, FB

703 Visualization: RC, TC, ED, VM, LM, FB

704 Funding acquisition: FB

705 Project administration: FB

706 Supervision: RC, FB

707 Writing – original draft: RC, FB

708 Writing – review & editing: RC, FB

709

#### 710 **Acknowledgement**

711 We thank Dr. Lucia Anna Muscarella and Dr. Vincenzo Giambra (Fondazione IRCCS Casa Sollievo  
712 della Sofferenza; San Giovanni Rotondo, Italy) for sharing NCI-H1573, NCI-H2126, NCI-H1975 and  
713 Jurkat cells respectively. We thank Dr. Karmele Valencia for her help in performing IHC analysis of  
714 CIMA-CUN cohort and Dr. Rose Mary Carletti for technical support with TLDA qRT-PCR experiments.

715 We thank Dr. Miriam Kuku Afanga for technical support with immunoblot experiments. Dr. Fabrizio  
716 Bianchi wishes to thank Prof. Pier Paolo di Fiore (European Institute of Oncology) for his support and  
717 mentorship. We are grateful to Chiara Di Giorgio for english editing and manuscript proofreading.

718

### 719 **Author's information**

720 <sup>1</sup> Unit of Cancer Biomarkers, Fondazione IRCCS Casa Sollievo della Sofferenza; Viale Cappuccini snc,  
721 71013 San Giovanni Rotondo, Italy. <sup>2</sup> Division of Thoracic Surgery, IEO, European Institute of Oncology  
722 IRCCS; 20141 Milan, Italy. <sup>3</sup> Division of Medical Genetics, Fondazione IRCCS Casa Sollievo della  
723 Sofferenza; Viale Cappuccini snc, 71013 San Giovanni Rotondo, Italy. <sup>4</sup> Clinical Genomics Unit,  
724 European Institute of Oncology; Milan, Italy. <sup>5</sup> Department of Experimental Oncology, European  
725 Institute of Oncology; Milan, Italy. <sup>6</sup> European Institute of Oncology IRCCS, Milan, Italy. <sup>7</sup> IFOM,  
726 Fondazione Istituto FIRC di Oncologia Molecolare, Via Adamello 16, 20139, Milan, Italy. <sup>8</sup> Division of  
727 Pathology, European Institute of Oncology IRCCS; 20141 Milan, Italy. <sup>9</sup> Unit of Pathology, Fondazione  
728 IRCCS Casa Sollievo della Sofferenza; Viale Cappuccini snc, 71013 San Giovanni Rotondo, Italy. <sup>10</sup>  
729 Solid Tumors Program, Center of Applied Medical Research (CIMA). University of Navarra and  
730 IDISNA, Pamplona, Spain. <sup>11</sup> Department of Pathology, Clínica Universidad de Navarra; Madrid, Spain.  
731 <sup>12</sup> CIBERONC, Madrid, Spain. <sup>13</sup> Pneumology Unit, Department of Medical Sciences, Fondazione  
732 IRCCS Casa Sollievo della Sofferenza; 71013 San Giovanni Rotondo (FG); Italy. <sup>14</sup> Department of  
733 Oncology and Hemato-Oncology, University of Milan; Milan, Italy.

734

### 735 **REFERENCES**

- 736 1. Siegel RL, Miller KD, Fuchs HE, Jemal A. Cancer Statistics, 2021. *CA A Cancer J Clin.* 2021;71:7–  
737 33.
- 738 2. Goldstraw P, Chansky K, Crowley J, Rami-Porta R, Asamura H, Eberhardt WEE, et al. The IASLC  
739 Lung Cancer Staging Project: Proposals for Revision of the TNM Stage Groupings in the Forthcoming

- 740 (Eighth) Edition of the TNM Classification for Lung Cancer. *Journal of Thoracic Oncology*.  
741 2016;11:39–51.
- 742 3. NSCLC Meta-analysis Collaborative Group. Preoperative chemotherapy for non-small-cell lung  
743 cancer: a systematic review and meta-analysis of individual participant data. *Lancet*. 2014;383:1561–  
744 71.
- 745 4. Hellmann MD, Chaft JE, William WN, Rusch V, Pisters KMW, Kalhor N, et al. Pathological  
746 response after neoadjuvant chemotherapy in resectable non-small-cell lung cancers: proposal for the  
747 use of major pathological response as a surrogate endpoint. *The Lancet Oncology*. 2014;15:e42–50.
- 748 5. Betticher DC, Hsu Schmitz SF, Totsch M, Hansen E, Joss C, von Briel C, et al. Mediastinal lymph  
749 node clearance after docetaxel-cisplatin neoadjuvant chemotherapy is prognostic of survival in patients  
750 with stage IIIA pN2 non-small-cell lung cancer: a multicenter phase II trial. *J Clin Oncol*.  
751 2003;21:1752–9.
- 752 6. Spaggiari L, Casiraghi M, Guarize J, Brambilla D, Petrella F, Maisonneuve P, et al. Outcome of  
753 Patients With pN2 “Potentially Resectable” Nonsmall Cell Lung Cancer Who Underwent Surgery  
754 After Induction Chemotherapy. *Semin Thorac Cardiovasc Surg*. 2016;28:593–602.
- 755 7. de Bruin EC, McGranahan N, Mitter R, Salm M, Wedge DC, Yates L, et al. Spatial and temporal  
756 diversity in genomic instability processes defines lung cancer evolution. *Science*. 2014;346:251–6.
- 757 8. Zhang J, Fujimoto J, Wedge DC, Song X, Seth S, Chow CW, et al. Intratumor heterogeneity in  
758 localized lung adenocarcinomas delineated by multiregion sequencing. *Science*. 2014;346:256–9.
- 759 9. Forde PM, Spicer J, Lu S, Provencio M, Mitsudomi T, Awad MM, et al. Neoadjuvant Nivolumab  
760 plus Chemotherapy in Resectable Lung Cancer. *N Engl J Med*. 2022;386:1973–85.
- 761 10. Calvo V, Sierra-Rodero B, Cruz-Bermúdez A, Provencio M. Role of immunotherapy in stage IIIA  
762 non-small cell lung cancer: a narrative review. *Curr Chall Thorac Surg*. 2021;3:38–38.
- 763 11. Guarize J, Bianchi F, Marino E, Belloni E, Vecchi M, Donghi S, et al. MicroRNA expression  
764 profile in primary lung cancer cells lines obtained by endobronchial ultrasound transbronchial needle  
765 aspiration. *J Thorac Dis*. 2018;10:408–15.
- 766 12. Rees MG, Seashore-Ludlow B, Cheah JH, Adams DJ, Price EV, Gill S, et al. Correlating chemical  
767 sensitivity and basal gene expression reveals mechanism of action. *Nat Chem Biol*. 2016;12:109–16.
- 768 13. Seashore-Ludlow B, Rees MG, Cheah JH, Cokol M, Price EV, Coletti ME, et al. Harnessing  
769 Connectivity in a Large-Scale Small-Molecule Sensitivity Dataset. *Cancer Discov*. 2015;5:1210–23.
- 770 14. Basu A, Bodycombe NE, Cheah JH, Price EV, Liu K, Schaefer GI, et al. An Interactive Resource to  
771 Identify Cancer Genetic and Lineage Dependencies Targeted by Small Molecules. *Cell*.  
772 2013;154:1151–61.
- 773 15. Yang W, Soares J, Greninger P, Edelman EJ, Lightfoot H, Forbes S, et al. Genomics of Drug  
774 Sensitivity in Cancer (GDSC): a resource for therapeutic biomarker discovery in cancer cells. *Nucleic  
775 Acids Res*. 2013;41:D955-961.



- 776 16. Corsello SM, Nagari RT, Spangler RD, Rossen J, Kocak M, Bryan JG, et al. Discovering the  
777 anticancer potential of non-oncology drugs by systematic viability profiling. *Nat Cancer*. 2020;1:235–  
778 48.
- 779 17. Hall MD, Telma KA, Chang K-E, Lee TD, Madigan JP, Lloyd JR, et al. Say No to DMSO:  
780 Dimethylsulfoxide Inactivates Cisplatin, Carboplatin, and Other Platinum Complexes. *Cancer Res*.  
781 2014;74:3913–22.
- 782 18. van Moorsel CJA, Kroep JR, Pinedo HM, Veerman G, Voorn DA, Postmus PE, et al.  
783 Pharmacokinetic schedule finding study of the combination of gemcitabine and cisplatin in patients  
784 with solid tumors. *Annals of Oncology*. 1999;10:441–8.
- 785 19. Kuenen BC, Rosen L, Smit EF, Parson MRN, Levi M, Ruijter R, et al. Dose-Finding and  
786 Pharmacokinetic Study of Cisplatin, Gemcitabine, and SU5416 in Patients With Solid Tumors. *JCO*.  
787 2002;20:1657–67.
- 788 20. Lin Z, Pan J, Chen L, Wang X, Chen Y. MiR-140 Resensitizes Cisplatin-Resistant NSCLC Cells to  
789 Cisplatin Treatment Through the SIRT1/ROS/JNK Pathway. *OTT*. 2020;Volume 13:8149–60.
- 790 21. Wu S, Wang H, Pan Y, Yang X, Wu D. miR-140-3p enhances cisplatin sensitivity and attenuates  
791 stem cell-like properties through repressing Wnt/ $\beta$ -catenin signaling in lung adenocarcinoma cells. *Exp*  
792 *Ther Med*. 2020;20:1664–74.
- 793 22. Shibue T, Weinberg RA. EMT, CSCs, and drug resistance: the mechanistic link and clinical  
794 implications. *Nat Rev Clin Oncol*. 2017;14:611–29.
- 795 23. Fazio M, Ablain J, Chuan Y, Langenau DM, Zon LI. Zebrafish patient avatars in cancer biology  
796 and precision cancer therapy. *Nat Rev Cancer*. 2020;20:263–73.
- 797 24. Xiao J, Glasgow E, Agarwal S. Zebrafish Xenografts for Drug Discovery and Personalized  
798 Medicine. *Trends Cancer*. 2020;6:569–79.
- 799 25. Agarwal V, Bell GW, Nam JW, Bartel DP. Predicting effective microRNA target sites in  
800 mammalian mRNAs. *eLife*. 2015;4.
- 801 26. Parra ER, Villalobos P, Behrens C, Jiang M, Pataer A, Swisher SG, et al. Effect of neoadjuvant  
802 chemotherapy on the immune microenvironment in non-small cell lung carcinomas as determined by  
803 multiplex immunofluorescence and image analysis approaches. *j immunotherapy cancer*. 2018;6:48.
- 804 27. Zhang P, Ma Y, Lv C, Huang M, Li M, Dong B, et al. Upregulation of programmed cell death  
805 ligand 1 promotes resistance response in non-small-cell lung cancer patients treated with neo-adjuvant  
806 chemotherapy. *Cancer Sci*. 2016;107:1563–71.
- 807 28. Shin J, Chung J-H, Kim SH, Lee KS, Suh KJ, Lee JY, et al. Effect of Platinum-Based  
808 Chemotherapy on PD-L1 Expression on Tumor Cells in Non-small Cell Lung Cancer. *Cancer Res*  
809 *Treat*. 2019;51:1086–97.

- 810 29. Tu X, Qin B, Zhang Y, Zhang C, Kahila M, Nowsheen S, et al. PD-L1 (B7-H1) Competes with the  
811 RNA Exosome to Regulate the DNA Damage Response and Can Be Targeted to Sensitize to Radiation  
812 or Chemotherapy. *Molecular Cell*. 2019;74:1215-1226.e4.
- 813 30. De S, Holvey-Bates EG, Mahen K, Willard B, Stark GR. The ubiquitin E3 ligase FBXO22  
814 degrades PD-L1 and sensitizes cancer cells to DNA damage. *Proc Natl Acad Sci USA*.  
815 2021;118:e2112674118.
- 816 31. Byers LA, Diao L, Wang J, Saintigny P, Girard L, Peyton M, et al. An epithelial-mesenchymal  
817 transition gene signature predicts resistance to EGFR and PI3K inhibitors and identifies Axl as a  
818 therapeutic target for overcoming EGFR inhibitor resistance. *Clin Cancer Res*. 2013;19:279–90.
- 819 32. La T, Liu GZ, Farrelly M, Cole N, Feng YC, Zhang YY, et al. A p53-Responsive miRNA Network  
820 Promotes Cancer Cell Quiescence. *Cancer Res*. 2018;78:6666–79.
- 821 33. Monterisi S, D’Ario G, Dama E, Rotmensz N, Confalonieri S, Tordonato C, et al. Mining cancer  
822 gene expression databases for latent information on intronic microRNAs. *Molecular oncology*.  
823 2015;9:473–87.
- 824 34. Garcia-Diaz A, Shin DS, Moreno BH, Saco J, Escuin-Ordinas H, Rodriguez GA, et al. Interferon  
825 Receptor Signaling Pathways Regulating PD-L1 and PD-L2 Expression. *Cell Reports*. 2017;19:1189–  
826 201.
- 827 35. Yi M, Niu M, Xu L, Luo S, Wu K. Regulation of PD-L1 expression in the tumor  
828 microenvironment. *J Hematol Oncol*. 2021;14:10.
- 829 36. Sun C, Mezzadra R, Schumacher TN. Regulation and Function of the PD-L1 Checkpoint.  
830 *Immunity*. 2018;48:434–52.
- 831 37. Ning T, Peng Z, Li S, Qu Y, Zhang H, Duan J, et al. miR-455 inhibits cell proliferation and  
832 migration via negative regulation of EGFR in human gastric cancer. *Oncology Reports*. 2017;38:175–  
833 82.
- 834 38. Peng S, Wang R, Zhang X, Ma Y, Zhong L, Li K, et al. EGFR-TKI resistance promotes immune  
835 escape in lung cancer via increased PD-L1 expression. *Mol Cancer*. 2019;18:165.
- 836 39. Wu A, Wu Q, Deng Y, Liu Y, Lu J, Liu L, et al. Loss of VGLL4 suppresses tumor PD-L1  
837 expression and immune evasion. *EMBO J*. 2019;38:e99506.
- 838 40. Kriegsman BA, Vangala P, Chen BJ, Meraner P, Brass AL, Garber M, et al. Frequent Loss of IRF2  
839 in Cancers Leads to Immune Evasion through Decreased MHC Class I Antigen Presentation and  
840 Increased PD-L1 Expression. *J Immunol*. 2019;203:1999–2010.
- 841 41. Abraham RT, Weiss A. Jurkat T cells and development of the T-cell receptor signalling paradigm.  
842 *Nat Rev Immunol*. 2004;4:301–8.
- 843 42. Cai M, Zhao X, Cao M, Ma P, Chen M, Wu J, et al. T-cell exhaustion interrelates with immune  
844 cytolytic activity to shape the inflamed tumor microenvironment. *J Pathol*. 2020;251:147–59.

- 845 43. Thorsson V, Gibbs DL, Brown SD, Wolf D, Bortone DS, Ou Yang T-H, et al. The Immune  
846 Landscape of Cancer. *Immunity*. 2018;48:812-830.e14.
- 847 44. Newman AM, Steen CB, Liu CL, Gentles AJ, Chaudhuri AA, Scherer F, et al. Determining cell  
848 type abundance and expression from bulk tissues with digital cytometry. *Nat Biotechnol*. 2019;37:773–  
849 82.
- 850 45. Burdett S, Stewart L, Auperin A, Pignon J-P. Chemotherapy in Non-Small-Cell Lung Cancer: An  
851 Update of an Individual Patient Data Meta-Analysis. *JCO*. 2005;23:924–5.
- 852 46. Reck M, Rodríguez-Abreu D, Robinson AG, Hui R, Csőszi T, Fülöp A, et al. Pembrolizumab  
853 versus Chemotherapy for PD-L1–Positive Non–Small-Cell Lung Cancer. *N Engl J Med*.  
854 2016;375:1823–33.
- 855 47. Gandhi L, Rodríguez-Abreu D, Gadgeel S, Esteban E, Felip E, De Angelis F, et al. Pembrolizumab  
856 plus Chemotherapy in Metastatic Non–Small-Cell Lung Cancer. *N Engl J Med*. 2018;378:2078–92.
- 857 48. Rusch VW, Chaft JE, Johnson B, Wistuba II, Kris MG, Lee JM, et al. Neoadjuvant atezolizumab in  
858 resectable non-small cell lung cancer (NSCLC): Initial results from a multicenter study (LCMC3).  
859 *JCO*. 2018;36:8541–8541.
- 860 49. Li J-Y, Chen Y-P, Li Y-Q, Liu N, Ma J. Chemotherapeutic and targeted agents can modulate the  
861 tumor microenvironment and increase the efficacy of immune checkpoint blockades. *Mol Cancer*.  
862 2021;20:27.
- 863 50. Wang M, Herbst RS, Boshoff C. Toward personalized treatment approaches for non-small-cell lung  
864 cancer. *Nat Med*. 2021;27:1345–56.
- 865 51. Lin P-Y, Yu S-L, Yang P-C. MicroRNA in lung cancer. *Br J Cancer*. 2010;103:1144–8.
- 866 52. Peng Y, Croce CM. The role of MicroRNAs in human cancer. *Sig Transduct Target Ther*.  
867 2016;1:15004.
- 868 53. Cai J, Fang L, Huang Y, Li R, Xu X, Hu Z, et al. Simultaneous overactivation of Wnt/ $\beta$ -catenin and  
869 TGF $\beta$  signalling by miR-128-3p confers chemoresistance-associated metastasis in NSCLC. *Nat*  
870 *Commun*. 2017;8:15870.
- 871 54. Yi M, Xu L, Jiao Y, Luo S, Li A, Wu K. The role of cancer-derived microRNAs in cancer immune  
872 escape. *J Hematol Oncol*. 2020;13:25.
- 873 55. Van Roosbroeck K, Fanini F, Setoyama T, Ivan C, Rodriguez-Aguayo C, Fuentes-Mattei E, et al.  
874 Combining Anti-Mir-155 with Chemotherapy for the Treatment of Lung Cancers. *Clin Cancer Res*.  
875 2017;23:2891–904.
- 876 56. Chen X, Ba Y, Ma L, Cai X, Yin Y, Wang K, et al. Characterization of microRNAs in serum: a  
877 novel class of biomarkers for diagnosis of cancer and other diseases. *Cell Res*. 2008;18:997–1006.
- 878 57. Dama E, Colangelo T, Fina E, Cremonesi M, Kallikourdis M, Veronesi G, et al. Biomarkers and  
879 lung cancer early detection: State of the art. *Cancers [Internet]*. 2021;13. Available from:

- 880 [https://www.scopus.com/inward/record.uri?eid=2-s2.0-](https://www.scopus.com/inward/record.uri?eid=2-s2.0-85111695617&doi=10.3390%2fcancers13153919&partnerID=40&md5=55717a9411e4f5ab28d788aff625ce1f)  
881 [85111695617&doi=10.3390%2fcancers13153919&partnerID=40&md5=55717a9411e4f5ab28d788aff](https://www.scopus.com/inward/record.uri?eid=2-s2.0-85111695617&doi=10.3390%2fcancers13153919&partnerID=40&md5=55717a9411e4f5ab28d788aff625ce1f)  
882 [625ce1f](https://www.scopus.com/inward/record.uri?eid=2-s2.0-85111695617&doi=10.3390%2fcancers13153919&partnerID=40&md5=55717a9411e4f5ab28d788aff625ce1f)
- 883 58. Schwarzenbach H, Hoon DS, Pantel K. Cell-free nucleic acids as biomarkers in cancer patients. *Nat*  
884 *Rev Cancer*. 2011;11:426–37.
- 885 59. Kumar MS, Lu J, Mercer KL, Golub TR, Jacks T. Impaired microRNA processing enhances  
886 cellular transformation and tumorigenesis. *Nature genetics*. 2007;39:673–7.
- 887 60. Rottenberg S, Disler C, Perego P. The rediscovery of platinum-based cancer therapy. *Nat Rev*  
888 *Cancer*. 2021;21:37–50.
- 889 61. Fournel L, Wu Z, Stadler N, Damotte D, Lococo F, Boulle G, et al. Cisplatin increases PD-L1  
890 expression and optimizes immune check-point blockade in non-small cell lung cancer. *Cancer Letters*.  
891 2019;464:5–14.
- 892 62. Danbaran GR, Aslani S, Sharafkandi N, Hemmatzadeh M, Hosseinzadeh R, Azizi G, et al. How  
893 microRNAs affect the PD-L1 and its synthetic pathway in cancer. *International Immunopharmacology*.  
894 2020;84:106594.
- 895 63. Zeng C, Ye S, Chen Y, Zhang Q, Luo Y, Gai L, et al. HOXA-AS3 Promotes Proliferation and  
896 Migration of Hepatocellular Carcinoma Cells via the miR-455-5p/PD-L1 Axis. Lu X-J, editor. *Journal*  
897 *of Immunology Research*. 2021;2021:1–12.
- 898 64. Xing Q, Xie H, Zhu B, Sun Z, Huang Y. MiR-455-5p Suppresses the Progression of Prostate  
899 Cancer by Targeting CCR5. *BioMed Research International*. 2019;2019:1–8.
- 900 65. Zheng X, Rui S, Wang X-F, Zou X-H, Gong Y-P, Li Z-H. circPVT1 regulates medullary thyroid  
901 cancer growth and metastasis by targeting miR-455-5p to activate CXCL12/CXCR4 signaling. *J Exp*  
902 *Clin Cancer Res*. 2021;40:157.
- 903 66. Aili T, Paizula X, Ayoufu A. miR-455-5p promotes cell invasion and migration in breast cancer.  
904 *Mol Med Report* [Internet]. 2017 [cited 2022 Nov 2]; Available from: [http://www.spandidos-](http://www.spandidos-publications.com/10.3892/mmr.2017.8101)  
905 [publications.com/10.3892/mmr.2017.8101](http://www.spandidos-publications.com/10.3892/mmr.2017.8101)
- 906 67. Yang Q, Hou C, Huang D, Zhuang C, Jiang W, Geng Z, et al. miR-455-5p functions as a potential  
907 oncogene by targeting galectin-9 in colon cancer. *Oncology Letters*. 2017;13:1958–64.
- 908 68. Chen D, Xie S, Wu Y, Cui Y, Cai Y, Lan L, et al. Reduction of Bladder Cancer Chemosensitivity  
909 Induced by the Effect of HOXA-AS3 as a ceRNA for miR-455-5p That Upregulates Notch1. *Front*  
910 *Oncol*. 2021;10:572672.
- 911 69. Zeng C, Ye S, Chen Y, Zhang Q, Luo Y, Gai L, et al. HOXA-AS3 Promotes Proliferation and  
912 Migration of Hepatocellular Carcinoma Cells via the miR-455-5p/PD-L1 Axis. *J Immunol Res*.  
913 2021;2021:9289719.

- 914 70. Aguilar EJ, Ricciuti B, Gainor JF, Kehl KL, Kravets S, Dahlberg S, et al. Outcomes to first-line  
915 pembrolizumab in patients with non-small-cell lung cancer and very high PD-L1 expression. *Annals of*  
916 *Oncology*. 2019;30:1653–9.
- 917 71. Rizvi H, Sanchez-Vega F, La K, Chatila W, Jonsson P, Halpenny D, et al. Molecular Determinants  
918 of Response to Anti-Programmed Cell Death (PD)-1 and Anti-Programmed Death-Ligand 1 (PD-L1)  
919 Blockade in Patients With Non-Small-Cell Lung Cancer Profiled With Targeted Next-Generation  
920 Sequencing. *J Clin Oncol*. 2018;36:633–41.
- 921 72. Fehrenbacher L, von Pawel J, Park K, Rittmeyer A, Gandara DR, Ponce Aix S, et al. Updated  
922 Efficacy Analysis Including Secondary Population Results for OAK: A Randomized Phase III Study of  
923 Atezolizumab versus Docetaxel in Patients with Previously Treated Advanced Non-Small Cell Lung  
924 Cancer. *J Thorac Oncol*. 2018;13:1156–70.
- 925 73. Gocher AM, Workman CJ, Vignali DAA. Interferon- $\gamma$ : teammate or opponent in the tumour  
926 microenvironment? *Nat Rev Immunol* [Internet]. 2021 [cited 2021 Dec 17]; Available from:  
927 <http://www.nature.com/articles/s41577-021-00566-3>
- 928 74. Ayers M, Lunceford J, Nebozhyn M, Murphy E, Loboda A, Kaufman DR, et al. IFN- $\gamma$ -related  
929 mRNA profile predicts clinical response to PD-1 blockade. *Journal of Clinical Investigation*.  
930 2017;127:2930–40.
- 931 75. Higgs BW, Morehouse CA, Streicher K, Brohawn PZ, Pilataxi F, Gupta A, et al. Interferon Gamma  
932 Messenger RNA Signature in Tumor Biopsies Predicts Outcomes in Patients with Non-Small Cell  
933 Lung Carcinoma or Urothelial Cancer Treated with Durvalumab. *Clin Cancer Res*. 2018;24:3857–66.
- 934 76. Uruga H, Bozkurtlar E, Huynh TG, Muzikansky A, Goto Y, Gomez-Caraballo M, et al.  
935 Programmed Cell Death Ligand (PD-L1) Expression in Stage II and III Lung Adenocarcinomas and  
936 Nodal Metastases. *Journal of Thoracic Oncology*. 2017;12:458–66.
- 937 77. Clark NA, Hafner M, Kouril M, Williams EH, Muhlich JL, Pilarczyk M, et al. GRcalculator: an  
938 online tool for calculating and mining dose–response data. *BMC Cancer*. 2017;17:698.
- 939 78. Dama E, Melocchi V, Dezi F, Pirroni S, Carletti RM, Brambilla D, et al. An Aggressive Subtype of  
940 Stage I Lung Adenocarcinoma with Molecular and Prognostic Characteristics Typical of Advanced  
941 Lung Cancers. *Clinical cancer research : an official journal of the American Association for Cancer*  
942 *Research*. 2017;23:62–72.
- 943 79. Sebaugh JL. Guidelines for accurate EC50/IC50 estimation. *Pharmaceut Statist*. 2011;10:128–34.

944

## 945 **FIGURE LEGENDS**

946

947 **Fig. 1. miRNA-expression profiling of LNmets collected by EBUS-TBNA. (A)** Strategy used for  
948 miRNA-expression profiling of LNmets NSCLC cells (EBUS-samples). **(B)** *Upper panels:* brightfield

949 images of three representative primary LNmets cell lines obtained as described in (A). Scale bar, 100  
950  $\mu\text{m}$ . *Lower panels*: representative confocal analysis of Pan-Citokeratins (PanCK) in LNmets cell lines.  
951 Pan-Citokeratins (red) identifies epithelial cells; DAPI (light blue) visualizes nuclei. Scale bar: 50 $\mu\text{m}$ .  
952 (C) Heat map showing qRT-PCR results of airway cell markers in five individual LN-metastatic cell  
953 lines. Two commercial lung cancer cells (LC; yellow) established from LNmets of stage IIIA NSCLC  
954 patients (NCI-H2023 and NCI-H1993) were used as positive controls for airway markers expression,  
955 while the breast cancer cells (BC; orange) MDA-MB-231 and leukemic cells (LK; magenta) HL-60 were  
956 used as negative controls. Data are  $\log_2$ -ratio. (D) Bar plot showing the number and percentage of  
957 miRNAs detected (yellow) or not detected (blue) in EBUS-samples. (E) Violin plot showing expression  
958 levels (Cqn) of all miRNAs detected in EBUS-samples. (F) Volcano plot showing differentially  
959 expressed miRNAs in chemoresistant (pN2; N=7) vs. chemosensitive (pN0; N=5) LNmets. Grey dot,  
960 unchanged; Blue dot, downregulated ( $p < 0.05$ ); Red dot, upregulated ( $p < 0.05$ ); Statistical significance  
961 was calculated using the Mann-Whitney U test. (G) Hierarchical clustering analysis of differentially  
962 expressed miRNAs (N=16, aka LN-signature) in pN2 vs pN0 LNmets. Data are  $\log_2$ -ratio. LUAD, lung  
963 adenocarcinoma; LUSC, lung squamous cell carcinoma.

964

965 **Fig. 2. LN-signature predicts chemotherapy response of chemo-naïve lung metastatic tumor tissue**  
966 **collected by mediastinoscopy.** (A) Hierarchical clustering analysis of the LN-signature in MED-  
967 samples. Data are  $\log_2$ -ratio. LUAD, lung adenocarcinoma; LUSC, lung squamous cell carcinoma;  
968 NSCLC, other non-small cell lung subtypes; NA, no available data. (B) Heat map showing gene  
969 expression of the indicated marker analyzed by qRT-PCR in LNmets (EBUS-samples, N=5; and MED-  
970 samples, N=5). NCI-H2023 and NCI-H1993 lung cancer cells (LC, yellow) were used as positive  
971 controls for the expression of epithelial marker while HUVEC (EN, orange), WI38 (FI, red) and HL-60  
972 cells (LK, magenta) were used as positive control for endothelial, fibroblast and immune-like markers

973 expression, respectively. Data are log<sub>2</sub>-ratio. (C) Pie chart showing the number of miRNAs of LN-  
974 signature (N=16) that were found differentially expressed between pN0 and pN2 samples in MED-  
975 cohort. (D) Schematic representation of strategy adopted to derive miRNA-based NACT predictive  
976 models. (E to G) *Upper panels*: receiver operating characteristic (ROC) curves of the 16-miRNA model  
977 (E), 14-miRNA model (F) and 4-miRNA model (G) in the validation set (MED-samples, red). *Lower*  
978 *panels*: box plot of the predicted probability of being a responder according to the 16-miRNA model (E),  
979 14-miRNA model (F) and 4-miRNA model (G).

980

981 **Fig. 3. Basal levels of miR-455-5p negatively correlate with cisplatin resistance *in vitro*.** (A) Heatmap  
982 of cell viability values (median normalized) of NSCLC cell lines at increasing concentrations of cisplatin.  
983 Heatmap square represents an individual drug concentration drug. For each dataset, number of cell lines  
984 and concentration range used (minimum-maximum) are indicated. (B) Dose-response curves of the  
985 indicated NSCLC cell lines treated with cisplatin for 72 hours. Error bars indicate SEM (N=3 to 5). (C)  
986 Distribution of potency (IC<sub>50</sub>) versus efficacy values (E<sub>max</sub>) of cisplatin in the indicated NSCLC cell lines.  
987 Data are mean ± SEM (N=3 to 5). (D) *Upper panel*: bubble plot reporting correlation coefficient (r)  
988 between basal level of normalized miRNA expression (Cqn) and IC<sub>50</sub> or E<sub>max</sub> values. The size of the  
989 bubble is proportional to statistical significance calculated by the Spearman correlation test, while colors  
990 indicate *r* coefficient. Yellow: common differentially expressed miRNAs in both EBUS- and MED-  
991 samples; Green: miRNAs differentially expressed in EBUS-samples only. *Lower panel*: box plot  
992 representing the expression levels (Cqn) of miRNAs in the panel of NSCLC cell lines. (E) Heatmap of  
993 mean value of IC<sub>50</sub>, E<sub>max</sub> and miR-455-5p expression (Cqn) in the indicated cell lines. (F) Box plot  
994 showing miR-455-5p expression levels (Cqn) in chemoresistant (pN2) and chemoresponsive (pN0)  
995 patients in MED- and EBUS-samples. P-values were calculated by the Mann-Whitney U test.

996

997 **Fig. 4. miR-455-5p modulates cisplatin resistance *in vitro* and *in vivo*.** (A) qRT-PCR of miR-455-5p  
998 in NCI-H1993 transfected with a miR-455-5p mimic (NCI-H1993 OE) or a negative control mimic (NCI-  
999 H1993 CTRL). Data, expressed as normalized Cq (Cqn), are mean  $\pm$  SEM (N=5). P-value was calculated  
1000 by the Mann-Whitney U test. (B) Dose-response curves of NCI-H1993 CTRL and NCI-H1993 OE cells  
1001 treated with cisplatin for 72 hours. Error bars indicate SEM (N=4). (C) Bar plot of cisplatin potency and  
1002 efficacy of NCI-H1993 CTRL and NCI-H1993 OE cells. Data are mean  $\pm$  SEM (N=4). Fold change is  
1003 relative to NCI-H1993 CTRL. P-value was calculated by one sample t-test. \*P<0.05; ns, not significant.  
1004 (D) Generation of a model of *in vitro* acquired cisplatin resistance. (E) qRT-PCR of miR-455-5p in  
1005 Parental and CDDP-R cell lines. Data, expressed as Cqn, are mean  $\pm$  SEM (N=4). P-value was calculated  
1006 by t-test with Welch's correction. (F) qRT-PCR of miR-455-5p in Parental and CDDP-R transfected  
1007 either with a miR-455-5p mimic (i.e., Parental OE, and CDDP-R OE) or a negative control mimic (i.e.,  
1008 Parental CTRL, and CDDP-R CTRL). Data, expressed as Cqn, are mean  $\pm$  SEM (N=4). P-value was  
1009 calculated using the Mann-Whitney U test. \*P <0.05. (G) Dose-response curves of indicated cell lines  
1010 treated with cisplatin for 72 hours. Error bars indicate SEM (N=5). (H) Bar plot of cisplatin potency and  
1011 efficacy of Parental CTRL, Parental OE, CDDP-R CTRL and CDDP-R OE cells. Data are mean  $\pm$  SEM  
1012 (N=5). Fold change is relative to CTRL. P-value was calculated by one sample t-test. \*\*P <0.01; ns, not  
1013 significant. (I) Schematic representation of zCDX model to monitor chemotherapy response *in vivo*. (J)  
1014 Representative fluorescence images of zebrafish larvae injected with tumor cells. Dil (red) identifies  
1015 tumor cells; eGFP (green) visualizes blood vessels. Scale bar: 200 $\mu$ m. (K) Representative fluorescence  
1016 images of tumor masses upon 3 days of cisplatin treatment. Dil (red) identifies tumor cells. Scale bar:  
1017 200 $\mu$ m. (L) Size distribution of tumor masses derived from indicated cell lines. Columns represent mean  
1018  $\pm$  SEM (N=16-20, for each condition). Results are shown as relative tumor size (i.e. percent change in  
1019 tumor size by comparing day 4 vs. day 1). Effect size is expressed as percent reduction in mean value of  
1020 tumor size. P-value were calculated by the Mann-Whitney U test.



1021 **Fig. 5. miR-455-5p modulates the expression of genes involved in interferon response.** (A) Volcano  
1022 plot showing differentially expressed genes found by microarray analysis. *Left panel:* pN2 vs. pN0  
1023 (MED-samples). *Central panel:* NCI-H1993 CTRL vs NCI-H1993 OE cells (N=2). *Right panel:* CDDP-  
1024 R CTRL (N=2) vs CDDP-R OE cells (N=2). Grey dot, unchanged genes; Blue dot, downregulated genes  
1025 (p-value <0.05; FC <-1.5); Red dot, upregulated genes (p-value <0.05; FC >1.5). P-value was calculated  
1026 using the Limma moderated t-test. (B) GSEA using miR-455-5p predicted target genes in pN2 vs. pN0  
1027 (MED-samples), H1993 CTRL vs H1993 OE or CDDP-R CTRL vs CDDP-R OE. NES, normalized  
1028 enrichment score; FDR, false-discovery rate. (C) Circular plot showing GSEA results using the  
1029 ‘Hallmark gene sets’ collection in pN2 vs pN0 (MED-samples), H1993 CTRL vs H1993 OE and CDDP-  
1030 R CTRL vs CDDP-R OE. In red, common enriched gene signatures having the same trend of regulation  
1031 in all experimental conditions. (D and E) GSEA of (D) IFN- $\alpha$  and (E) IFN- $\gamma$  response gene sets in pN2  
1032 vs pN0 (MED-samples), H1993 CTRL vs H1993 OE and CDDP-R CTRL vs CDDP-R OE. (F) Venn  
1033 diagram representing the overlap of genes between IFN- $\alpha$ /IFN- $\gamma$  response gene sets and miR-455-5p  
1034 target genes.

1035

1036 **Fig. 6. miR-455-5p regulates cisplatin resistance through direct regulation of PD-L1 expression.**  
1037 (A) Target Scan prediction of miR-455-5p binding (seed sequence in red) to human *PD-L1* 3’UTR. (B)  
1038 Spearman correlation analysis of cell surface PD-L1 expression (reciprocal of mean fluorescence  
1039 intensity values) and miR-455-5p levels (Cqn) in the panel of NSCLC cell lines. (C) Bar plot of *PD-L1*  
1040 expression (microarray log<sub>2</sub> intensity) in pN2 and pN0 patients (MED-samples). Error bars represent  
1041 SEM. P-value was calculated by Limma moderated t-test. (D and E) Distribution of PD-L1 expression  
1042 (TPS [tumor proportion score],) and miR-455-5p levels (Cqn) in NSCLC primary tumors obtained from  
1043 CSS cohort (D) and CIMA-CUN Cohort (E). (F) Correlation analysis of miR-455-5p levels with PD-L1  
1044 mRNA in tumors from TGCA-LUAD and TGCA-LUSC cohorts Left: Bubble plots report the correlation

1045 coefficients. Size of the bubbles indicates statistical significance. Right: Bar plot reporting the value of  
1046 miR-455-5p normalized count for each tertile threshold in TGCA-LUAD and TGCA-LUSC cohorts. The  
1047 number of patients was reported inside the bar. **(G)** Representative flow cytometry histogram plots (left)  
1048 and quantification (right) of PD-L1 median fluorescence intensity (MFI) in the indicated cell lines treated  
1049 with a miR-455-5p mimic (OE) or a negative control mimic (CTRL). Results are shown as fold change  
1050 of MFI relative to CTRL cells. Data are mean  $\pm$  SEM (N=4 or 5). P-values were calculated by one sample  
1051 t-test. \*P<0.05, \*\*P<0.01, \*\*\*P<0.001; ns, not significant. **(H)** Representative flow cytometry histogram  
1052 plots (left) and quantification (right) of cell surface PD-L1 MFI in CDDP-R cells transfected with a miR-  
1053 455-5p mimic or a negative control in the presence of a scramble TSB or a PD-L1-specific miR-455-5p  
1054 TSB. Data are reported as fold change in MFI relative to CDDP-R cells transfected with a CTRL miRNA  
1055 mimic and with a scramble TSB. Data are mean  $\pm$  SEM (N=6). P-values were calculated by one sample  
1056 t-test. \*P<0.05, \*\*P<0.001; ns, not significant. **(I)** Bar plot representing cell viability (Fold change  
1057 relative to CTRL mimic in the presence of a scramble TSB) of CDDP-R cells transfected as in (G) and  
1058 treated for 72h with cisplatin at the indicated doses. Data are mean  $\pm$  SEM (N=5). P-values were  
1059 calculated by one sample t-test. \*P<0.05, \*\*P<0.01; ns, not significant. **(J)** Bar plot representing cell-  
1060 surface PD-L1 expression in the indicated cell lines stimulated for 48 hours with  $\pm$  40 ng/ml of IFN- $\gamma$ .  
1061 The result is shown as fold change in the MFI relative to Parental CTRL cells. Data are mean  $\pm$  SEM  
1062 (N=3). P-values were calculated by one sample t-test. \*P<0.05, \*\*P<0.01, \*\*\*P<0.001; ns, not  
1063 significant. **(K)** Immunoblot analysis of pEGFR, EGFR and PD-L1 in BEAS-2B transfected with a miR-  
1064 455-5p mimic or a negative control and treated for 36 hours with  $\pm$  40ng/ml of EGF. GAPDH was used  
1065 as loading control. **(L)** Immunoblot analysis of pEGFR, EGFR and PD-L1 expression in NCI-H1975  
1066 transfected with a miR-455-5p mimic or a negative control. GAPDH was used as loading control.  
1067

1068 **Fig. 7. miR-455-5p overexpression decreases T cell apoptosis.** (A) Representative flow cytometry  
1069 histogram plot (upper panel) and quantification (lower panel) of PD-1 MFI in Jurkat cells stimulated  
1070 either with  $\pm$  CD3/CD28/CD2 soluble antibody complexes for 72 hours. Results are shown as fold change  
1071 of MFI relative to not active cells. Data are mean  $\pm$  SEM (N=4). P-value was calculated by one sample  
1072 t-test. (B and C) NCI-H1975 cells transfected with the indicated oligos were exposed to IFN- $\gamma$  for 8 hours  
1073 and then co-cultured for 72 hours with Jurkat cells in the presence of T cell activator. (B) Representative  
1074 flow cytometry histogram plots (left) and quantification (right) of PD-L1 MFI at the indicated  
1075 experimental conditions. Results are shown as fold change of MFI relative to control conditions. Data  
1076 are mean  $\pm$  SEM (N=4). P-values were calculated by one sample t-test. (C) Analysis of Jurkat apoptosis  
1077 rate co-cultured with the indicated cell lines by AnnexinV/7-AAD staining. Right panels: Representative  
1078 flow cytometric plots (left) and quantification (right) of apoptotic dead Jurkat cells (Annexin V+, 7-  
1079 AAD+; highlighted in red). Results are shown as fold change of apoptotic dead cells relative to matched  
1080 control conditions. Data are mean  $\pm$  SEM (N=4). P-values were calculated by one sample t-test. (D-E-  
1081 F) Distribution of the percentage of CD8+ cells and miR-455-5p expression, expressed as z-score, in  
1082 NSCLC primary tumors from CD8-CIMA-CUN (D), CD8-CSS Cohort (E) and after pooling together  
1083 the two cohorts (F). Tumors were stratified in high and low CD8-tumors based on the median value of  
1084 CD8+ z-score. (G) *Left*: correlation analysis of miR-455-5p levels with PD-L1 mRNA, gene signature  
1085 for exhausted CD8+ T cell (GET), IFN- $\gamma$  and IFN- $\alpha$  response in tumors from TGCA-LUAD and TGCA-  
1086 LUSC cohorts. Bubble plots reported the correlation coefficients for miR-455-5p expression with the  
1087 indicated variables. The size of the bubbles indicates statistical significance calculated by the Spearman  
1088 correlation analysis. Right: Bar plot reporting the Thorsson immune subtype of TGCA-LUAD and -  
1089 LUSC tumors according to miR-455-5p expression. P-value was calculated by using the t test for equality  
1090 of proportions (High vs Low). \*\*\*\*P<0.001 (referred to C3). (H) Schematic model of the effects of miR-  
1091 455-5p-dependent PD-L1 regulation in NSCLC.

1092

1093 **TABLE LEGENDS**

1094 **Table 1. Clinical-pathological characteristics of EBUS cohort.** Abbreviations: LUAD, Lung  
1095 adenocarcinoma; LUSC, Lung squamous cell carcinoma; NACT, Neoadjuvant chemotherapy; CDDP,  
1096 Cisplatin; GEM, Gemcitabine; CBDCA, Carboplatin; NA, no available data.

1097

1098 **Table 2. Clinical-pathological characteristics of MED cohort.** Abbreviations: LUAD, Lung  
1099 adenocarcinoma; LUSC, Lung squamous cell carcinoma; NSCLC, other non-small cell lung subtypes;  
1100 NACT, Neoadjuvant chemotherapy; CDDP, Cisplatin; GEM, Gemcitabine; CBDCA, Carboplatin; VNR,  
1101 Vinorelbine; NA, no available data.

1102

1103 **Table 3. Combination of clinical model with miRNA predictive model in MED cohort. (A)**  
1104 Performance of single predictive models based on clinical information (age, gender or histology) or  
1105 miRNA expression (16, 14 and 4 miRNAs). **(B-D)** Combination of clinical models with 16 miRNA risk  
1106 score (B), 14 miRNA risk score (C) and 4 miRNA risk score (D). Odds Ratio (OR), P-value calculated  
1107 by Wald Test and AUC of indicated models are reported in the table.

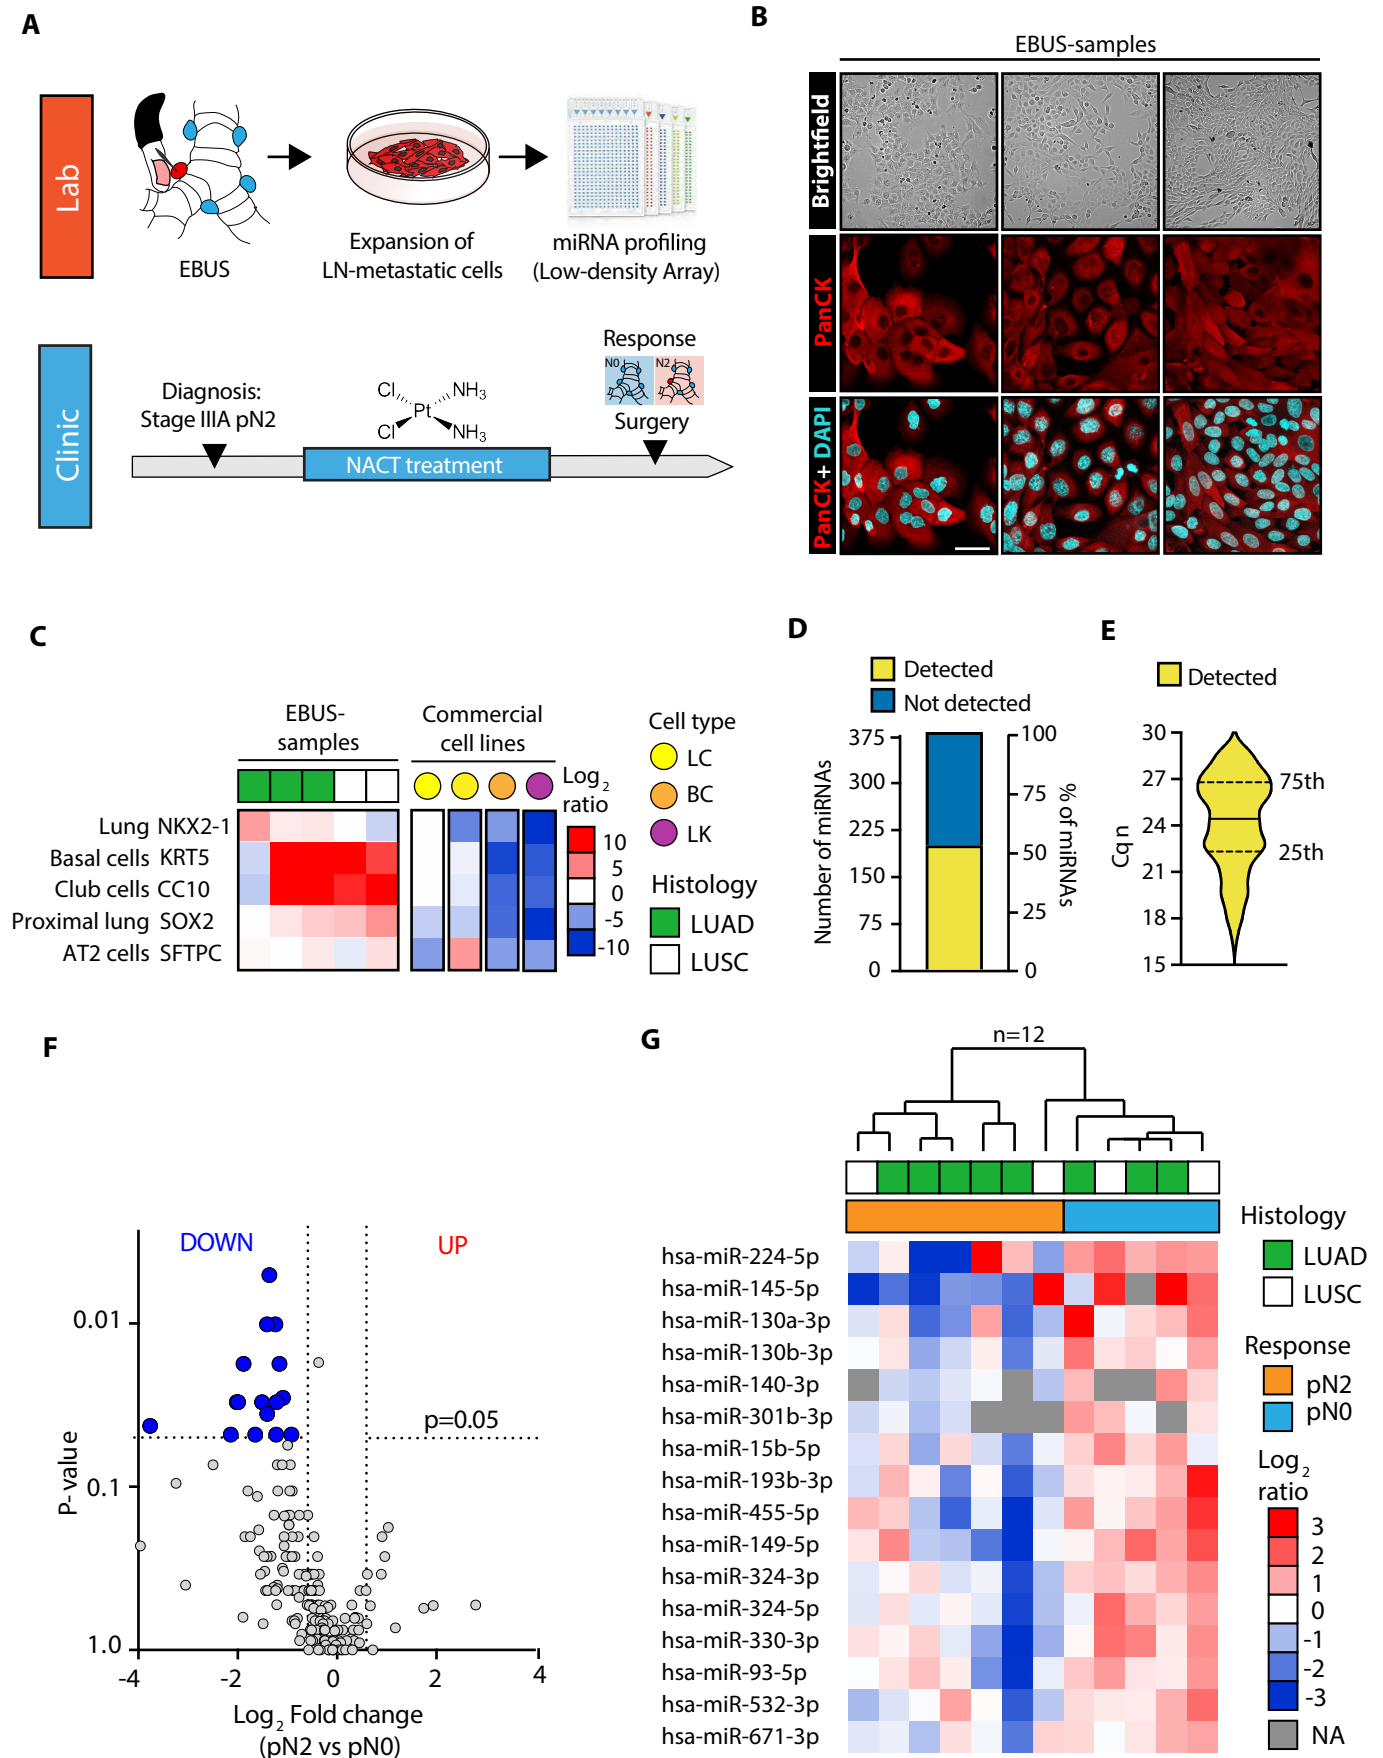

**A**

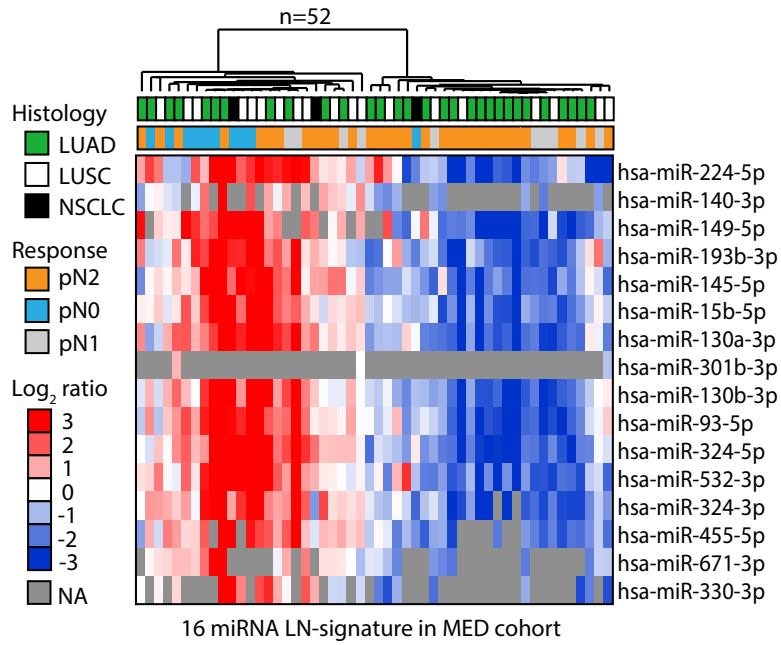

**B**

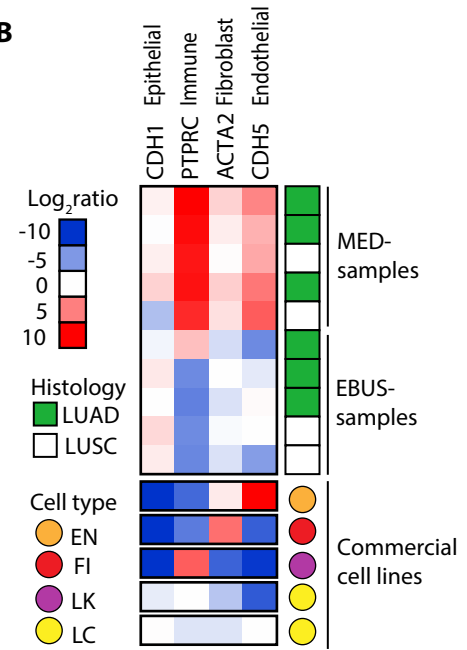

**C**

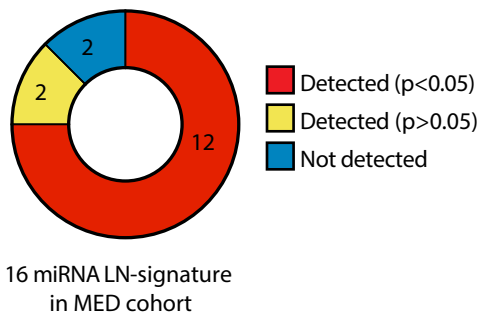

**D**

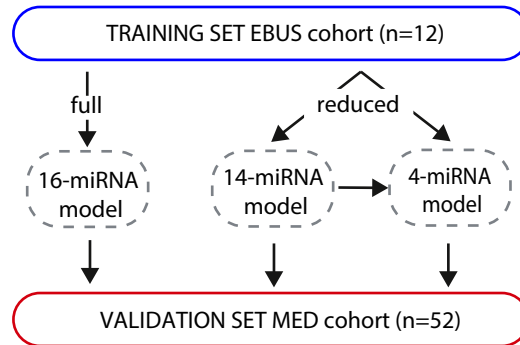

**E**

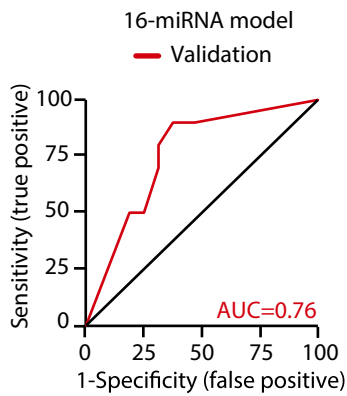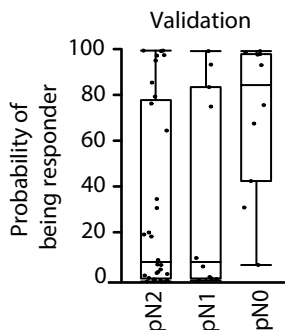

**F**

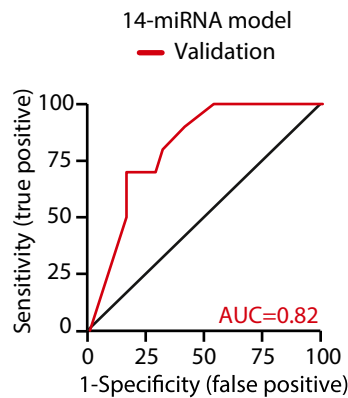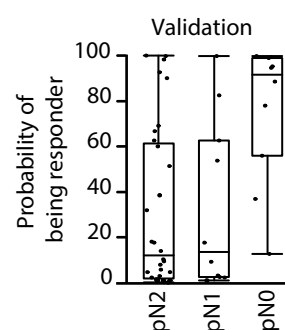

**G**

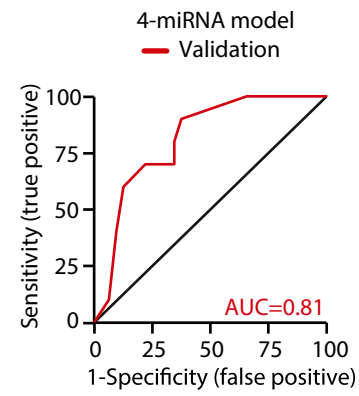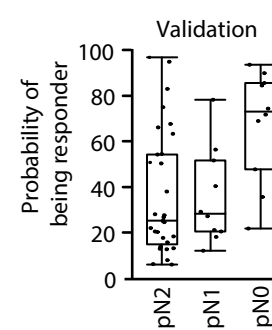

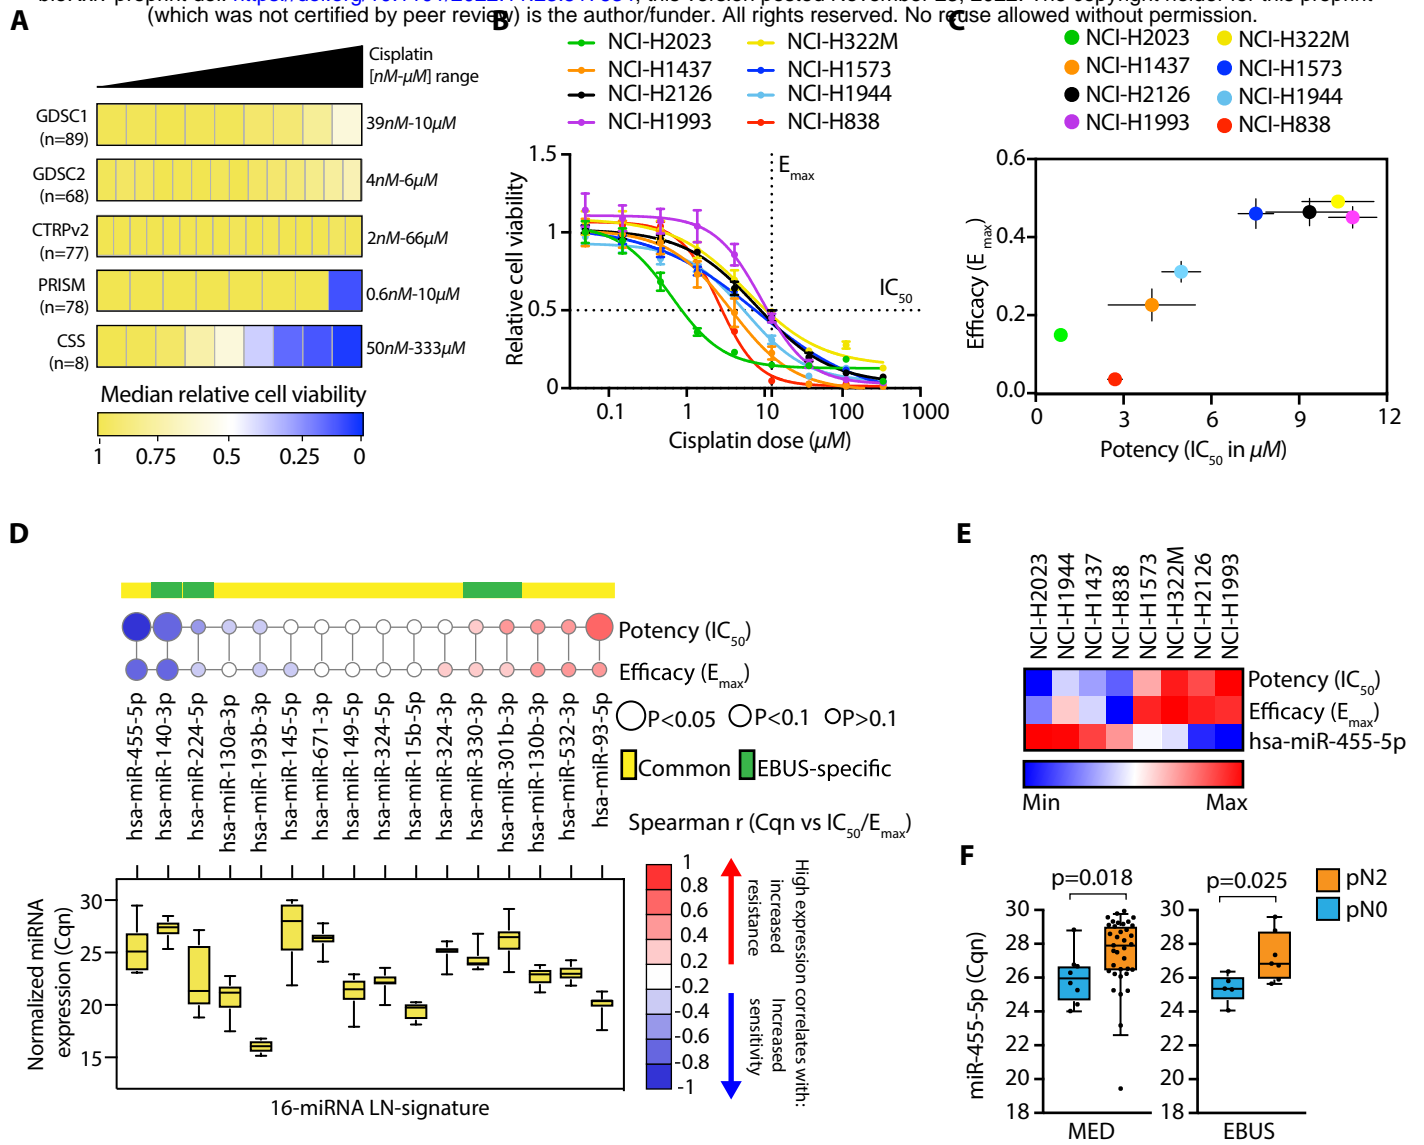

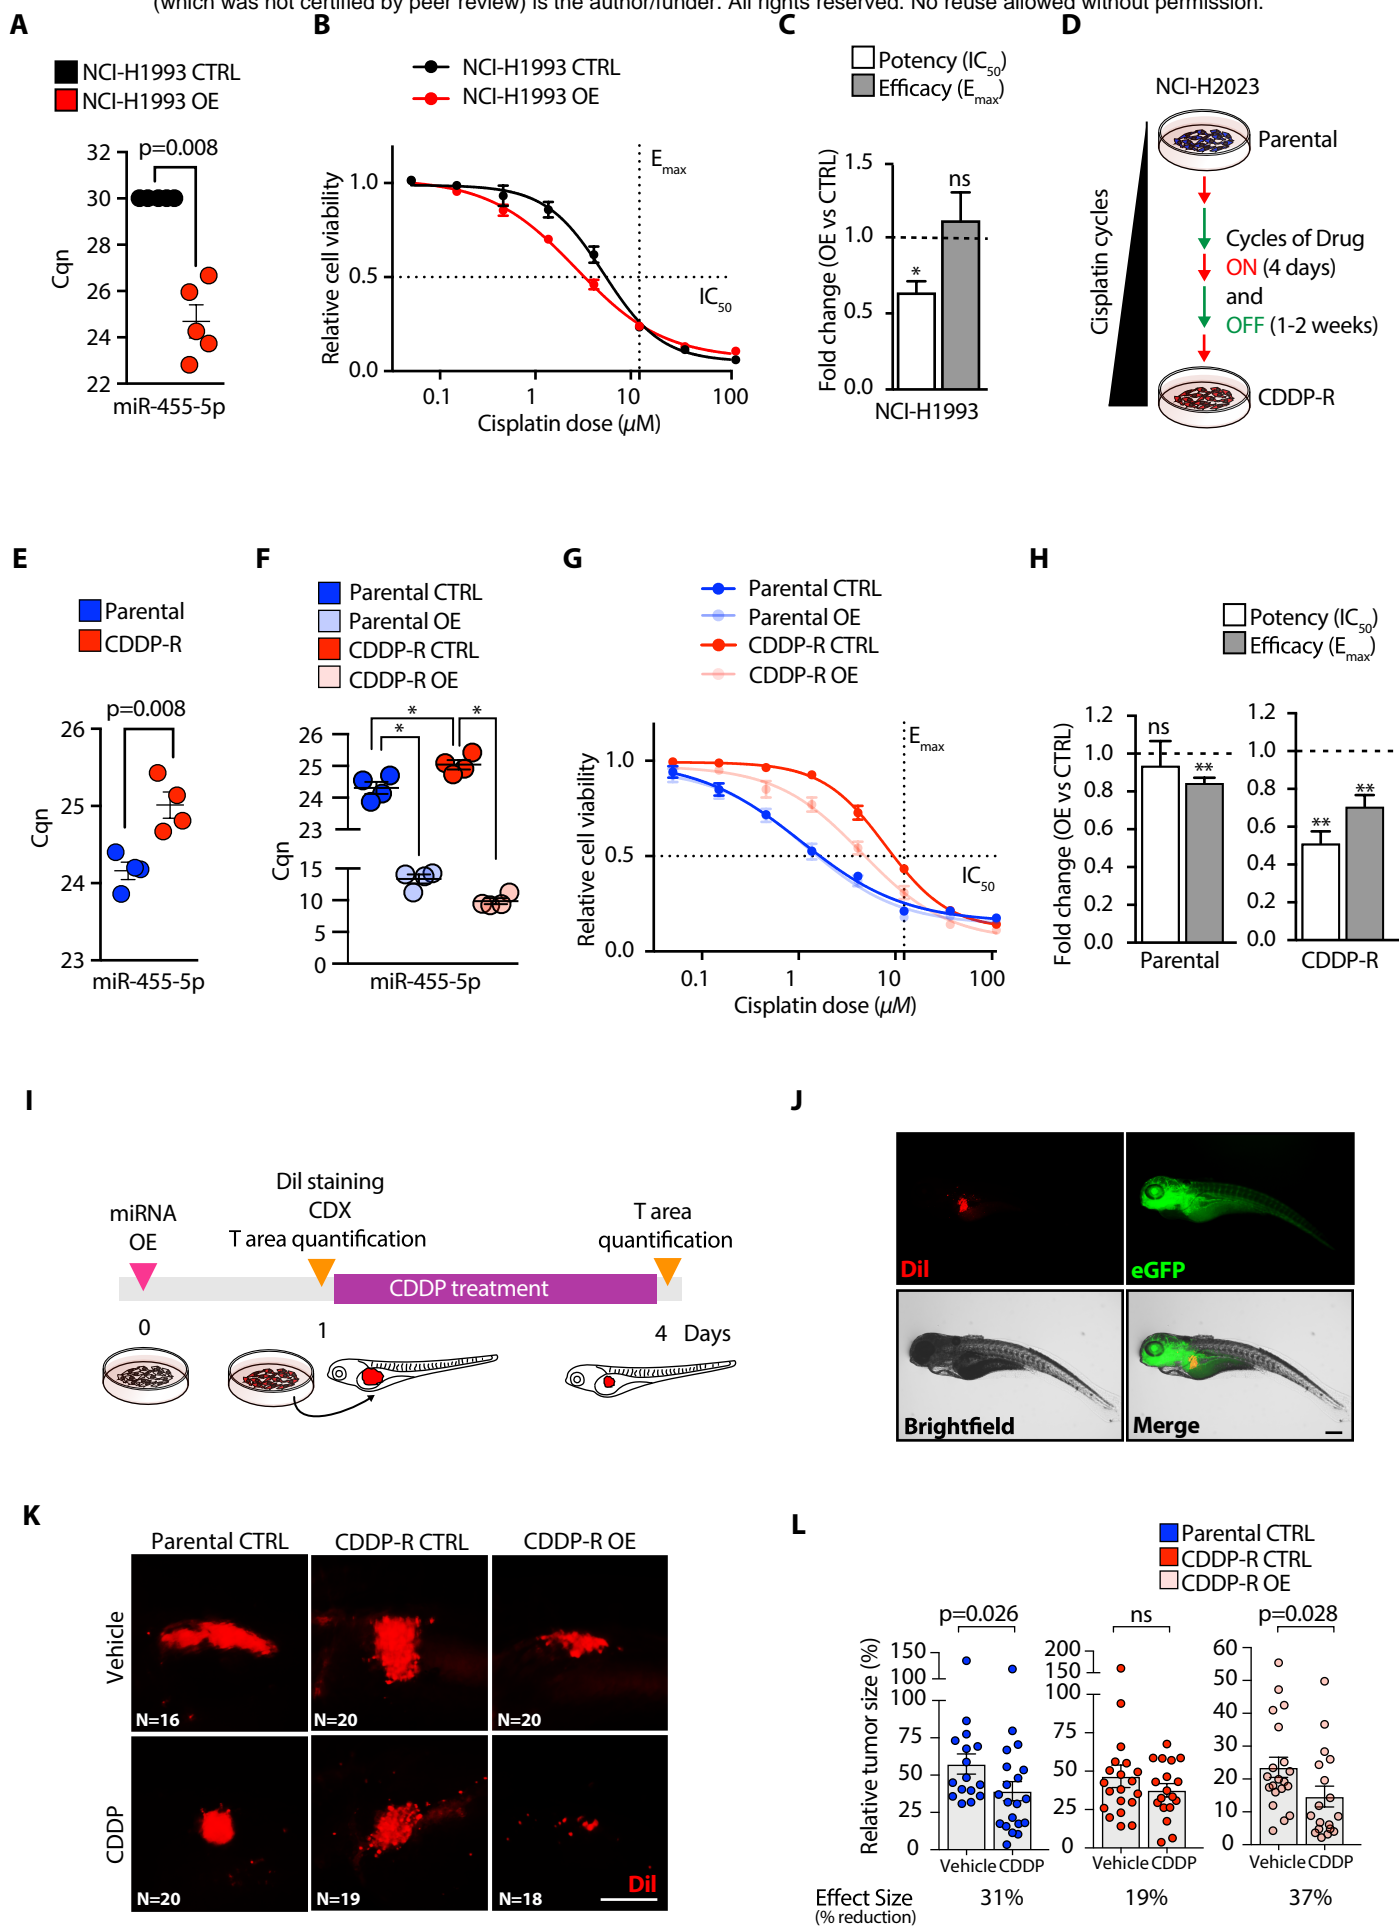



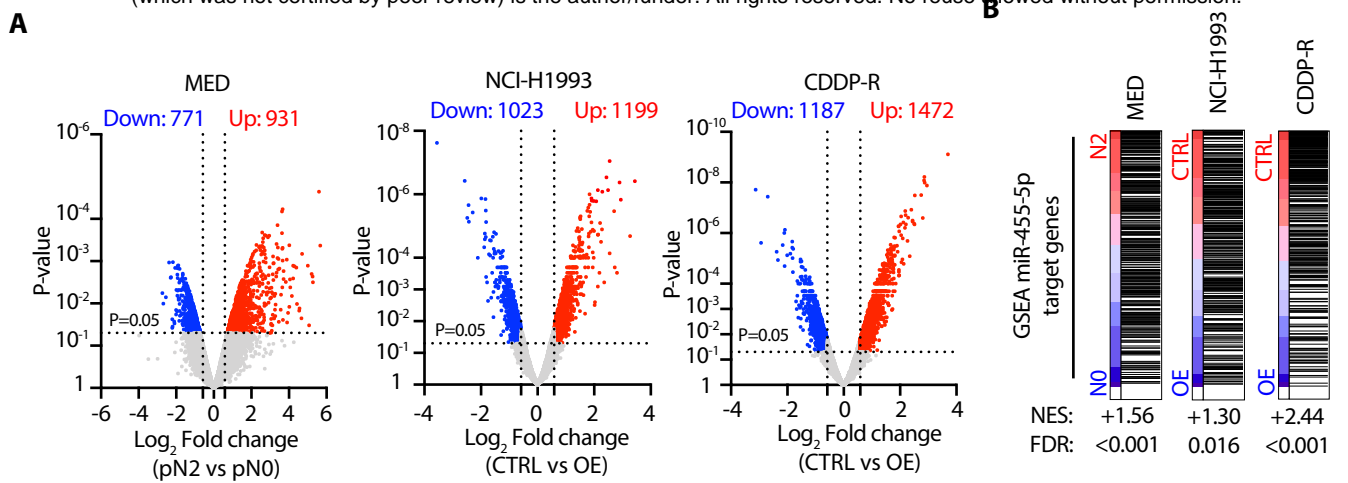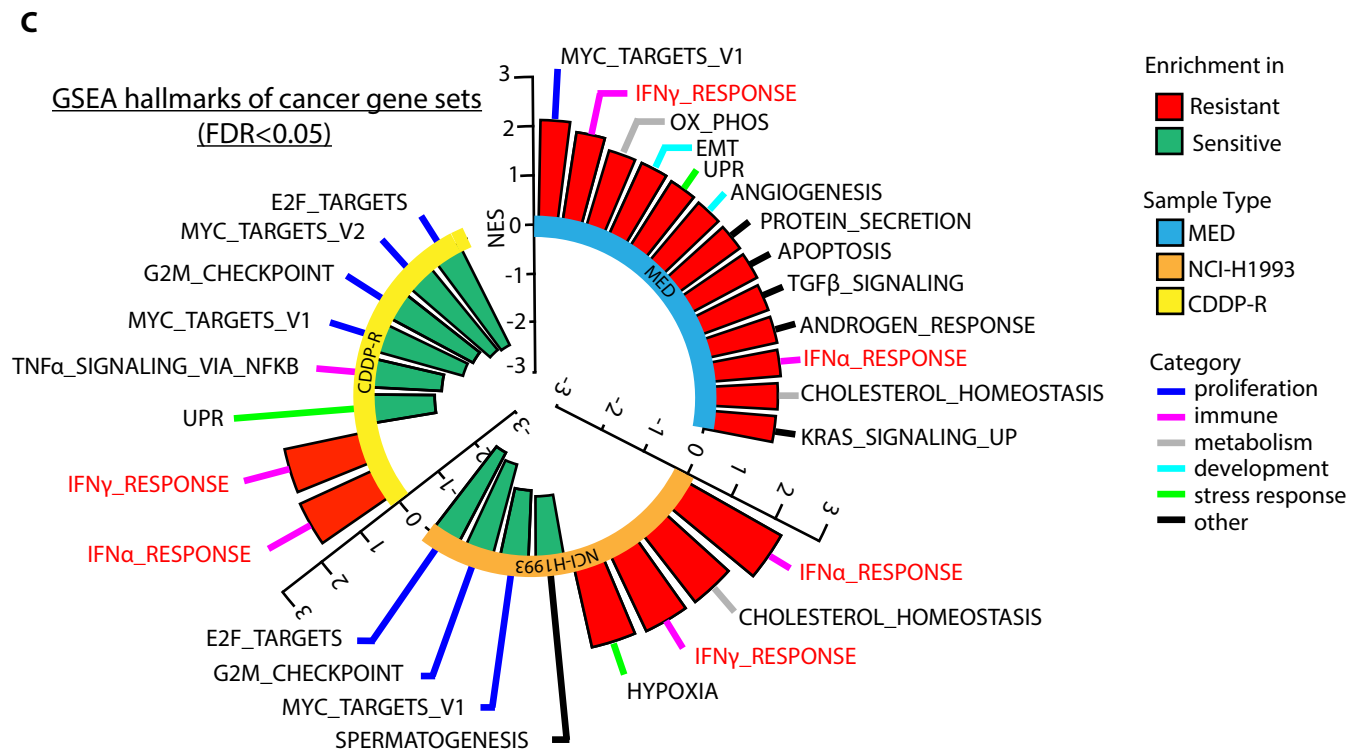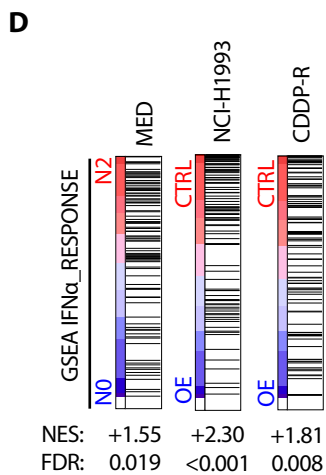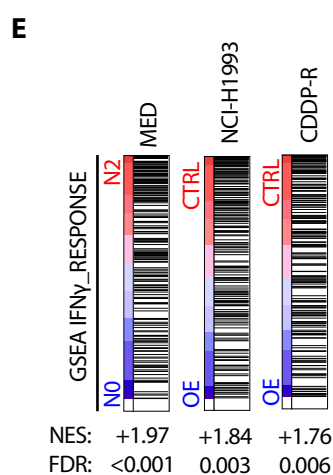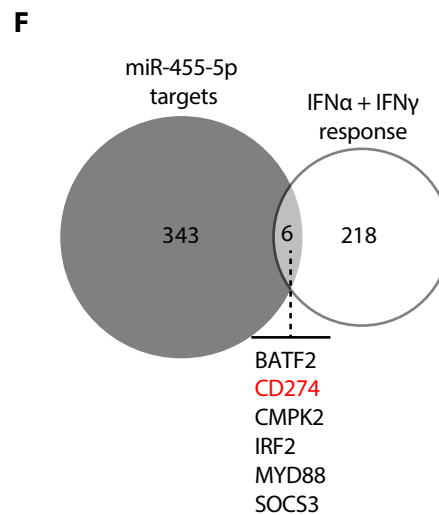

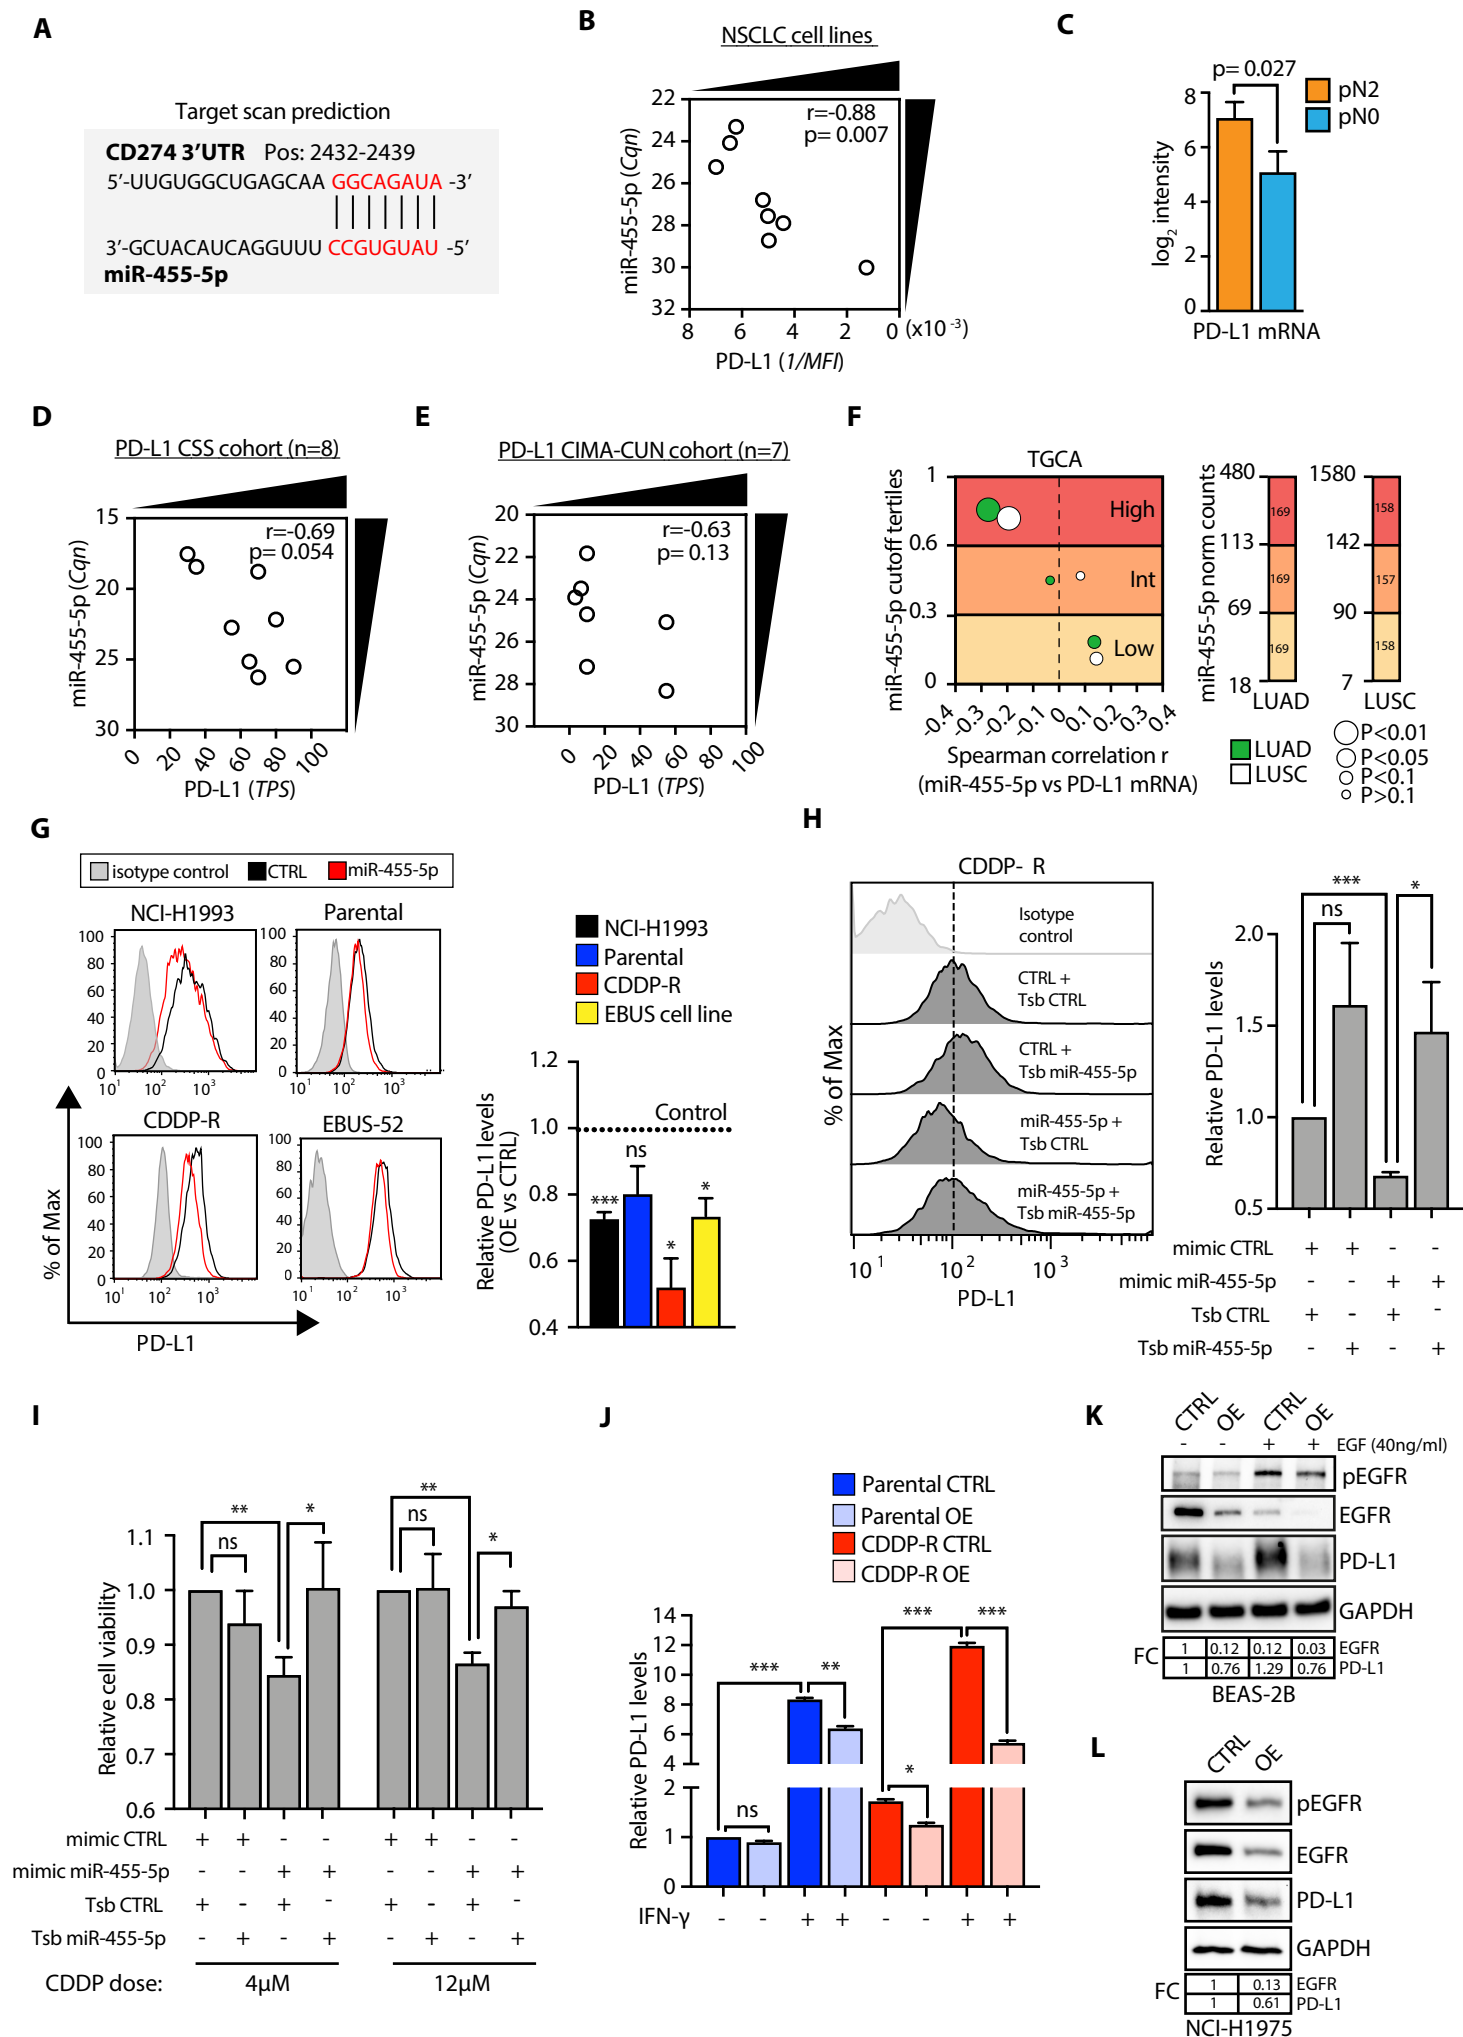

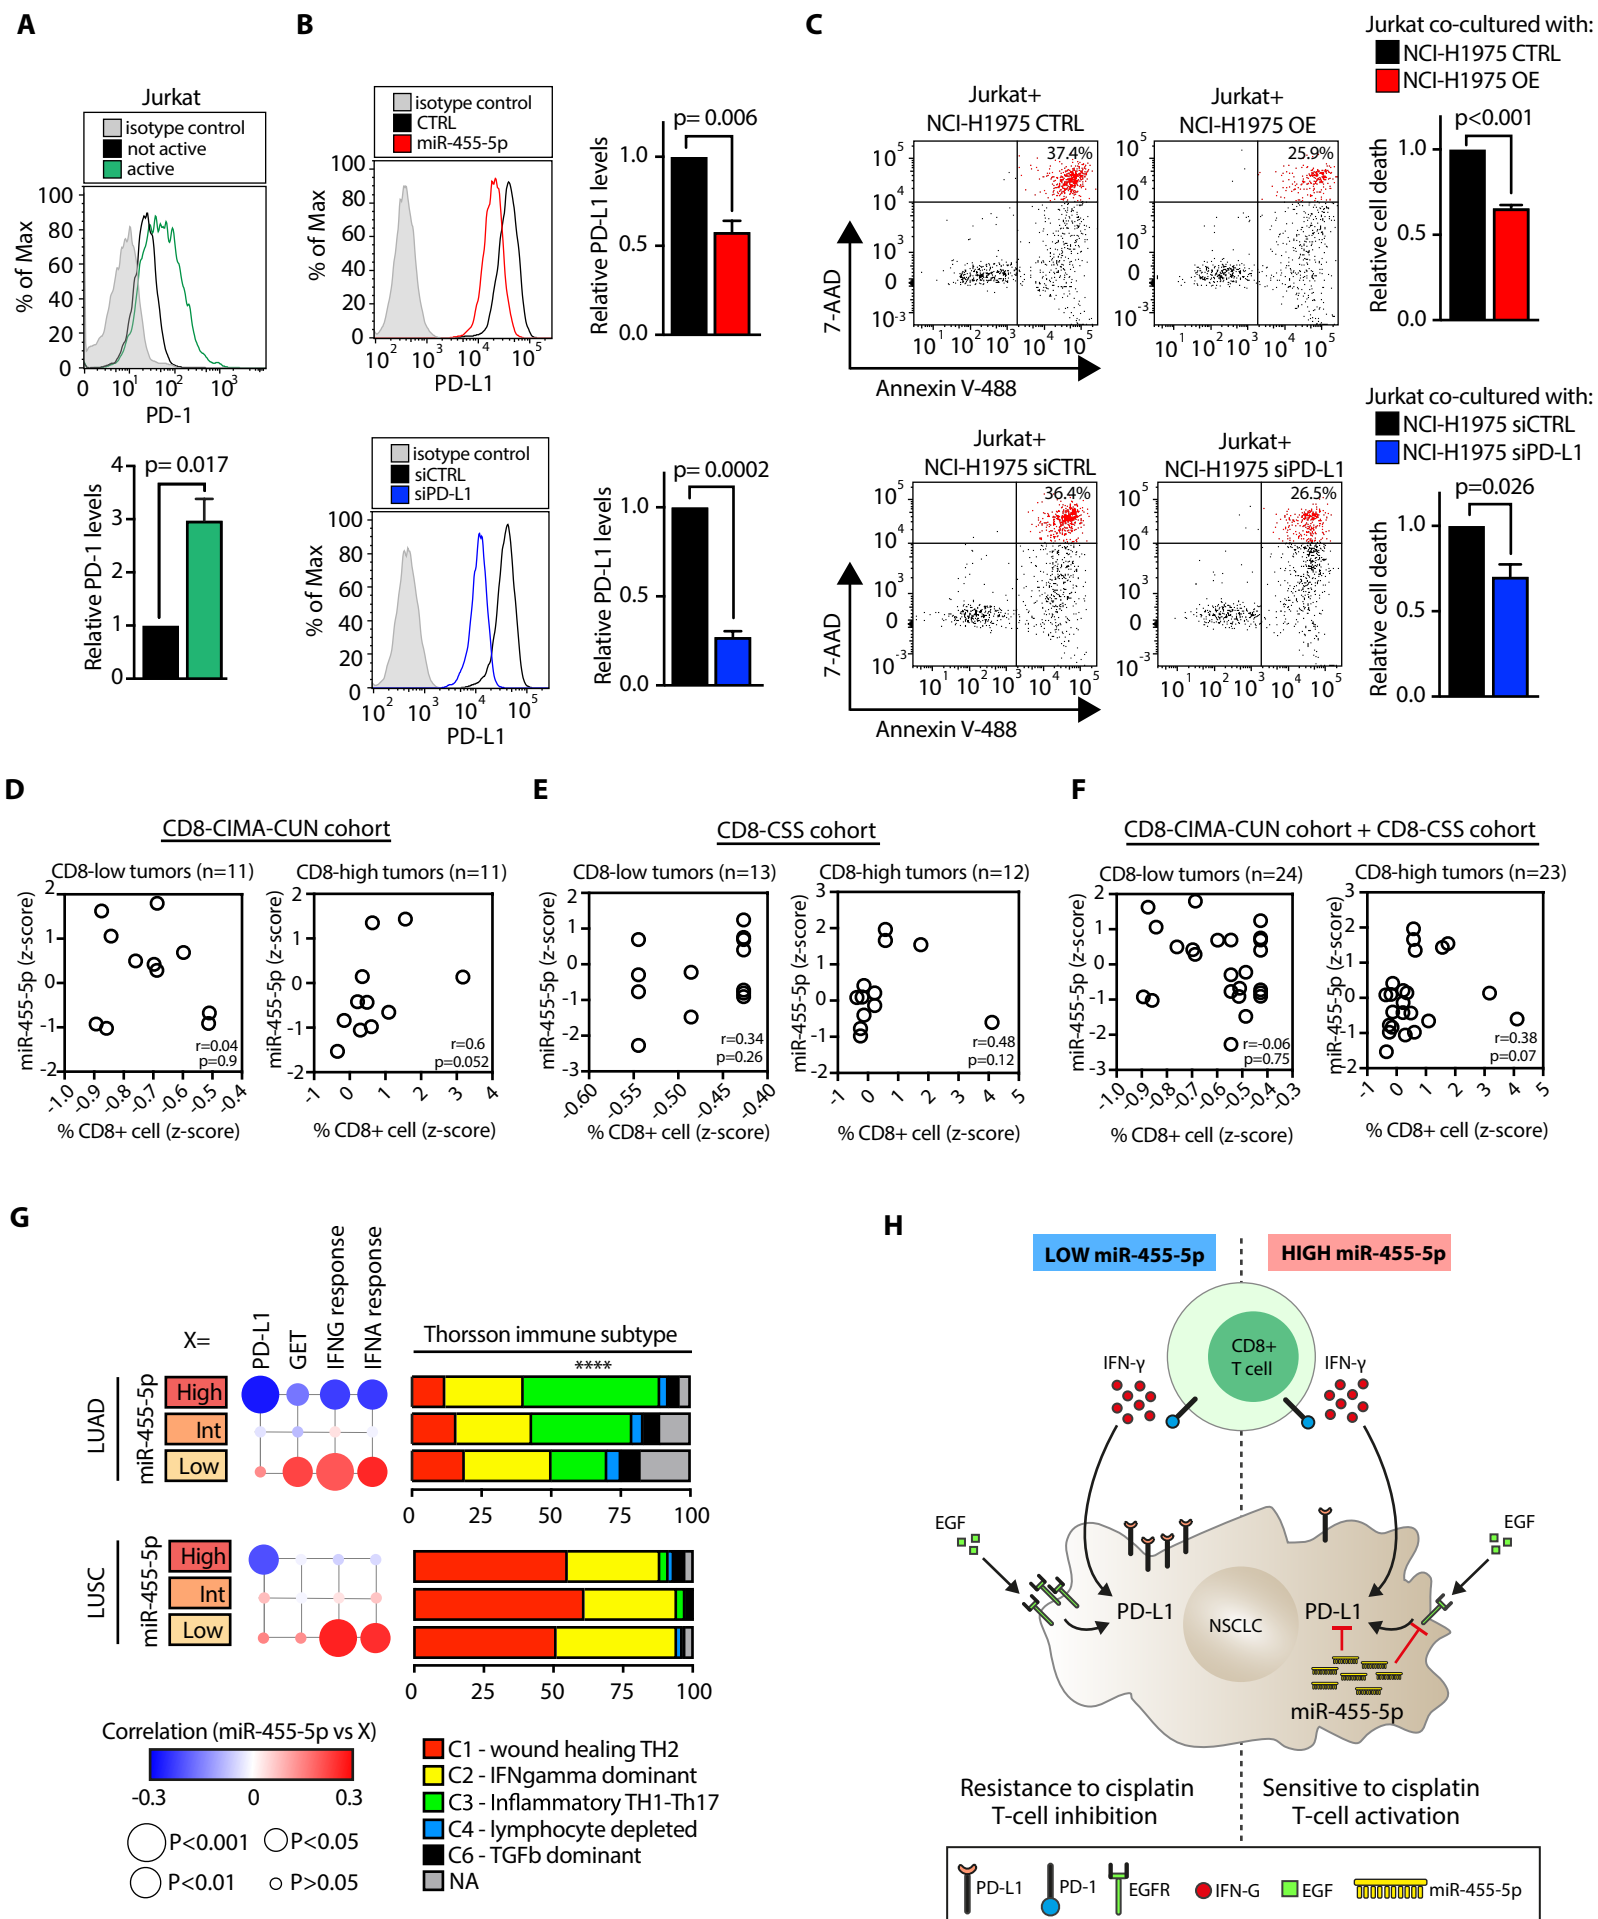

**Table 1. Clinical-pathological characteristics of EBUS cohort**

|                              | <b>ALL<br/>(n=12)</b> | <b>pN0 (n=5)</b> | <b>pN2 (n=7)</b> |
|------------------------------|-----------------------|------------------|------------------|
| <b>Age [years]</b>           |                       |                  |                  |
| Median (Q1;Q3)               | 67 (62;72)            | 69 (66;74)       | 64 (57;72)       |
| <b>Gender</b>                |                       |                  |                  |
| Female                       | 5 (42%)               | 2 (40%)          | 3 (43%)          |
| Male                         | 7 (58%)               | 3 (60%)          | 4 (57%)          |
| <b>Histology</b>             |                       |                  |                  |
| LUAD                         | 8 (67%)               | 3 (60%)          | 5 (71%)          |
| LUSC                         | 4 (33%)               | 2 (40%)          | 2 (29%)          |
| <b>Stage</b>                 |                       |                  |                  |
| IIIA                         | 12 (100%)             | 5 (100%)         | 7 (100%)         |
| <b>NACT regimen</b>          |                       |                  |                  |
| CDDP+GEM                     | 10 (83%)              | 5 (100%)         | 5 (71%)          |
| CBDCA+GEM                    | 1 (8%)                | 0 (0%)           | 1 (14%)          |
| NA                           | 1 (8%)                | 0 (0%)           | 1 (14%)          |
| <b>Number of NACT cycles</b> |                       |                  |                  |
| 3 cycles                     | 8 (67%)               | 2 (40%)          | 6 (86%)          |
| 4 cycles                     | 3 (25%)               | 3 (60%)          | 0 (0%)           |
| NA                           | 1 (8%)                | 0 (0%)           | 1 (14%)          |

*Percentages could not add up to 100% due to rounding*

**Table 2. Clinical-pathological characteristics of MED cohort** (which was not certified by peer review) is the author/funder. All rights reserved. No reuse allowed without permission. posted November 23, 2022. The copyright holder for this preprint

|                              | <b>ALL (n=52)</b>    | <b>pN0 (n=10)</b>    | <b>pN2 (n=32)</b>    | <b>pN1 (n=10)</b>    |
|------------------------------|----------------------|----------------------|----------------------|----------------------|
| <b>Age</b>                   |                      |                      |                      |                      |
| Median (Q1;Q3)               | 62.12 (59.18; 68.24) | 62.05 (59.81; 70.32) | 61.32 (58.82; 66.97) | 62.95 (59.86; 66.32) |
| <b>Gender</b>                |                      |                      |                      |                      |
| Female                       | 15 (28.8%)           | 3 (30%)              | 9 (28.1%)            | 3 (30%)              |
| Male                         | 37 (71.2%)           | 7 (70%)              | 23 (71.9%)           | 7 (70%)              |
| <b>Histology</b>             |                      |                      |                      |                      |
| LUAD                         | 30 (57.7%)           | 4 (40%)              | 22 (68.7%)           | 4 (40%)              |
| LUSC                         | 19 (36.5%)           | 4 (40%)              | 9 (28.1%)            | 6 (60%)              |
| NSCLC                        | 3 (5.8%)             | 2 (20%)              | 1 (3.1%)             | 0 (0%)               |
| <b>Stage</b>                 |                      |                      |                      |                      |
| IIIA                         | 46 (88.5%)           | 8 (80%)              | 29 (90.6%)           | 9 (90%)              |
| IIIB                         | 6 (11.5%)            | 2 (20%)              | 3 (9.4%)             | 1 (10%)              |
| <b>NACT regimen</b>          |                      |                      |                      |                      |
| CDDP+ALIMTA                  | 6 (11.5%)            | 0 (0%)               | 5 (15.6%)            | 1 (10%)              |
| CDDP+GEM                     | 41 (78.8%)           | 9 (90%)              | 25 (78.1%)           | 7 (70%)              |
| CDDP+TAXOTERE                | 1 (1.9%)             | 0 (0%)               | 1 (3.1%)             | 0 (0%)               |
| CDDP+VNR                     | 4 (7.7%)             | 1 (10%)              | 0 (0%)               | 2 (20%)              |
| VNR+GEM                      | 1 (1.9)              | 0 (0%)               | 1 (3.1%)             | 0 (0%)               |
| <b>Number of NACT cycles</b> |                      |                      |                      |                      |
| 2-3 cycles                   | 42 (80.8%)           | 9 (90%)              | 24 (75%)             | 9 (90%)              |
| 4-5 cycles                   | 9 (17.3%)            | 1 (10%)              | 7 (25%)              | 1 (10%)              |

Percentages could not add up to 100% due to rounding

**Table 3: Combination of clinical model with miRNA predictive model in MED cohort**  
bioRxiv preprint doi: <https://doi.org/10.1101/2023.11.20.561175>; this version posted November 23, 2023. The copyright holder for this preprint (which was not certified by peer review) is the author/funder. All rights reserved. No reuse allowed without permission.

(A)

| MED-cohort (validation set)         | OR (95% CI)       | Wald p-value | AUC |
|-------------------------------------|-------------------|--------------|-----|
| <b>clinical model</b>               |                   |              |     |
| Age (5-unit increase)               | 1.04 (0.65-1.66)  | 0.88         | 67% |
| Gender (male vs. female)            | 0.58 (0.10-3.31)  | 0.54         |     |
| Histology (LUSC/NSCLC NOS vs. LUAD) | 3.88 (0.79-19.18) | 0.1          |     |
| <b>miRNA model</b>                  |                   |              |     |
| 16-miRNA risk score                 | 1.20 (1.00-1.44)  | 0.046        | 76% |
| 14-miRNA risk score                 | 1.37 (1.07-1.75)  | 0.0125       | 82% |
| 4-miRNA risk score                  | 2.00 (1.17-3.42)  | 0.0116       | 81% |

(B)

| MED-cohort (validation set)         | OR (95% CI)       | Wald p-value | AUC |
|-------------------------------------|-------------------|--------------|-----|
| <b>clinical model</b>               |                   |              |     |
| Age (5-unit increase)               | 1.12 (0.67-1.86)  | 0.67         | 77% |
| Gender (male vs. female)            | 0.46 (0.07-2.98)  | 0.42         |     |
| Histology (LUSC/NSCLC NOS vs. LUAD) | 2.71 (0.51-14.48) | 0.24         |     |
| <b>miRNA model</b>                  |                   |              |     |
| 16-miRNA risk score                 | 1.19 (0.99-1.45)  | 0.07         |     |

(C)

| MED-cohort (validation set)         | OR (95% CI)       | Wald p-value | AUC |
|-------------------------------------|-------------------|--------------|-----|
| <b>clinical model</b>               |                   |              |     |
| Age (5-unit increase)               | 1.13 (0.67-1.93)  | 0.88         | 82% |
| Gender (male vs. female)            | 0.40 (0.06-2.78)  | 0.54         |     |
| Histology (LUSC/NSCLC NOS vs. LUAD) | 2.40 (0.42-13.79) | 0.1          |     |
| <b>miRNA model</b>                  |                   |              |     |
| 14-miRNA risk score                 | 1.37 (1.06-1.77)  | 0.0175       |     |

(D)

| MED-cohort (validation set)         | OR (95% CI)       | Wald p-value | AUC |
|-------------------------------------|-------------------|--------------|-----|
| <b>clinical model</b>               |                   |              |     |
| Age (5-unit increase)               | 1.14 (0.67-1.94)  | 0.63         | 80% |
| Gender (male vs. female)            | 0.46 (0.07-3.11)  | 0.42         |     |
| Histology (LUSC/NSCLC NOS vs. LUAD) | 1.95 (0.33-11.38) | 0.46         |     |
| <b>miRNA model</b>                  |                   |              |     |
| 4-miRNA risk score                  | 1.98 (1.11-3.54)  | 0.0216       |     |
